# Supplementary material for: Palladium-catalyzed direct arylation of indoles with arylsulfonyl hydrazides
Source: Royal Society of Chemistry journal article supplement (doi:10.1039/c5ob02569a), 2016-01-01

## **Palladium-Catalyzed Direct Arylation of Indoles with Arylsulfonyl Hydrazides**

Congrong Liu,<sup>a,\*</sup> Lianghai Ding,<sup>a</sup> Guang Guo,<sup>a</sup> Weiwei Liu<sup>b</sup>

<sup>a</sup> School of Environment Engineering, Nanjing Institute of Technology, Nanjing, Jiangsu 211167, China

<sup>b</sup> School of Communication Engineering, Nanjing Institute of Technology, Nanjing, Jiangsu 211167, China

### **Supporting Information**

#### **Table of Contents**

|                                                                                                                          |      |
|--------------------------------------------------------------------------------------------------------------------------|------|
| General Information.....                                                                                                 | S-2  |
| Preparation of Arylsulfonyl Hydrazides.....                                                                              | S-2  |
| General Procedure for Palladium-Catalyzed Direct Arylation of Indoles with Arylsulfonyl Hydrazides (Tables 2 and 3)..... | S-2  |
| Procedure for The Control Reaction .....                                                                                 | S-2  |
| Analytical Data for The Products Shown in Tables 2 and 3.....                                                            | S-2  |
| ESI-MS Analysis of The Mixture of p-Toluenesulfonyl Hydrazide ( <b>1a</b> ) and Pd(OAc) <sub>2</sub> in DMSO.....        | S-8  |
| References.....                                                                                                          | S-10 |
| Copies of <sup>1</sup> H and <sup>13</sup> C NMR Spectra.....                                                            | S-11 |

### General Information

$^1\text{H}$  and  $^{13}\text{C}$  NMR spectra were recorded on a Bruker AC-300 FT spectrometer at 400 MHz and 100 MHz, respectively, with tetramethylsilane as an internal reference. Chemical shifts ( $\delta$ ) and coupling constants ( $J$ ) were expressed in ppm and Hz, respectively. IR spectra were recorded on a Perkin-Elmer 2000 FTIR spectrometer. High resolution mass spectra (HRMS) were recorded on a LC-TOF spectrometer (Micromass). ESI-MS data were acquired using a Thermo LTQ Orbitrap XL Instrument equipped with an ESI source and controlled by Xcalibur software. Melting points were uncorrected.

**1c-l** were prepared according to the literature procedure.<sup>1</sup> Chemicals were purchased from the Sinopharm Chemical Reagent Co., Merger, Acros and Alfa Aesar, and used as received.

### Preparation of Arylsulfonyl Hydrazides

Hydrazine monohydrate (500 mg, 10.0 mmol) was added dropwise to a solution of an arylsulfonyl chloride (4.0 mmol) in tetrahydrofuran (20 mL) under nitrogen at 0 °C. During the addition the mixture became brown and a white precipitate of hydrazine hydrochloride was deposited. The mixture was stirred at 0 °C for 30 min, added ethyl acetate (1200 mL), and washed with saturated brine (3 x 20 mL). The organic layer was dried over sodium sulfate, filtered, and added slowly to stirred hexane (25 mL) over 5 min. After being stirred for 10 min, the mixture was filtered, and the collected solid was dried in vacuum. The yields for the formation of arylsulfonyl hydrazides range from 66% to 90%.

### General Procedure for The Direct Arylation of Indoles with Arylsulfonyl Hydrazides

To a solution of indole **1** (0.20 mmol) in dimethyl sulfoxide (1.0 mL) under oxygen (1 atm) at room temperature were added arylsulfonyl hydrazide **2** (0.24 mmol), TfOH (36.0 mg, 0.24 mmol) and Pd(OAc)<sub>2</sub> (2.2 mg, 0.010 mmol). The mixture was stirred at 70 °C for 20 h, cooled to room temperature, and directly purified by preparative thin layer chromatography on silica gel, developing with petroleum ether/ethyl acetate (100:1 to 20:1), to give compound **3**.

### Procedure for The Control Reaction

To a solution of indole **1a** (23.4 mg, 0.20 mmol) in dimethyl sulfoxide (1.0 mL) under oxygen (1 atm) at room temperature were added *p*-tolenesulfonyl hydrazide **2a** (44.6 mg, 0.24 mmol), TEMPO (31.2 mg, 0.20 mmol), TfOH (36.0 mg, 0.24 mmol) and Pd(OAc)<sub>2</sub> (2.2 mg, 0.010 mmol). The mixture was stirred at 70 °C for 20 h, cooled to room temperature, and directly purified by preparative thin layer chromatography on silica gel, developing with petroleum ether/ethyl acetate (100:1), to give compound **3aa** in 86% yield.

### Analytical Data for The Products Shown in Tables 2 and 3

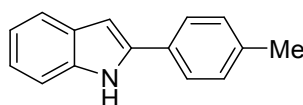

**3aa**

**3aa**,<sup>[2]</sup> white solid, m.p. 214-216 °C; <sup>1</sup>H NMR (400 MHz, CDCl<sub>3</sub>) δ 8.26 (s, br, 1H), 7.61 (d, *J* = 7.6 Hz, 1H), 7.52 (d, *J* = 8.0 Hz, 2H), 7.35 (d, *J* = 8.0 Hz, 1H), 7.23-7.08 (m, 4H), 6.82 (s, 1H), 2.37 (s, 3H); <sup>13</sup>C NMR (100 MHz, CDCl<sub>3</sub>): 138.1, 137.7, 136.7, 129.7, 129.6, 129.4, 125.1, 122.1, 120.6, 120.2, 110.9, 99.4, 21.3.

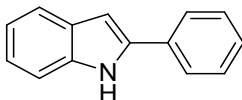

**3ab**

**3ab**,<sup>[2]</sup> white solid, m.p. 186-187 °C; <sup>1</sup>H NMR (400 MHz, CDCl<sub>3</sub>) δ 8.30 (s, br, 1H), 7.68-7.62 (m, 3H), 7.45-7.41 (m, 3H), 7.34-7.29 (m, 1H), 7.23-7.17 (m, 2H), 6.82 (s, 1H); <sup>13</sup>C NMR (100 MHz, CDCl<sub>3</sub>): 137.9, 136.8, 132.4, 129.3, 129.0, 127.7, 125.2, 122.4, 120.7, 120.3, 110.9, 100.0.

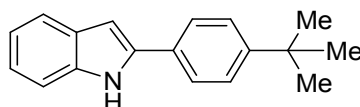

**3ac**

**3ac**, white solid, m.p. 251-253 °C; <sup>1</sup>H NMR (400 MHz, CDCl<sub>3</sub>) δ 8.30 (s, br, 1H), 7.63-7.55 (m, 3H), 7.46 (d, *J* = 7.6 Hz, 2H), 7.39 (d, *J* = 8.0 Hz, 1H), 7.20-7.15 (m, 1H), 7.13-7.09 (m, 1H), 6.79 (s, 1H), 1.36 (s, 9H); <sup>13</sup>C NMR (100 MHz, CDCl<sub>3</sub>): 150.9, 136.7, 129.6, 129.4, 126.0, 124.9, 122.1, 120.5, 120.2, 110.8, 99.5, 34.7, 31.3; HRMS (EI) calcd for C<sub>18</sub>H<sub>19</sub>N (M) 249.1517, found 249.1530.

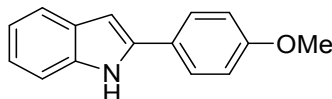

**3ad**

**3ad**,<sup>[2]</sup> white solid, m.p. 225-226 °C; <sup>1</sup>H NMR (400 MHz, CDCl<sub>3</sub>) δ 8.26 (s, br, 1H), 7.61 (d, *J* = 8.0 Hz, 3H), 7.38 (d, *J* = 7.6 Hz, 1H), 7.18-7.08 (m, 2H), 6.98 (d, *J* = 8.8 Hz, 2H), 6.71 (s, 1H), 3.86 (s, 3H); <sup>13</sup>C NMR (100 MHz, CDCl<sub>3</sub>): 159.3, 137.8, 136.6, 129.3, 128.5, 126.4, 125.1, 121.8, 120.3, 120.1, 114.4, 110.6, 98.7, 55.3.

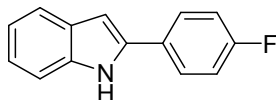

**3ae**

**3ae**,<sup>[2]</sup> white solid, m.p. 185-185 °C; <sup>1</sup>H NMR (400 MHz, CDCl<sub>3</sub>) δ 8.24 (s, br, 1H), 7.66-7.57 (m, 3H), 7.37 (d, *J* = 8.4 Hz, 1H), 7.21-7.09 (m, 1H), 7.24-7.01 (m, 3H), 6.74 (s, 1H); <sup>13</sup>C NMR (100 MHz, CDCl<sub>3</sub>): 162.4 (d, *J* = 246 Hz), 137.0, 129.2, 126.9 (d, *J* = 8.1), 122.4, 120.4, 116.0 (d, *J* = 21.7), 110.9, 99.9.

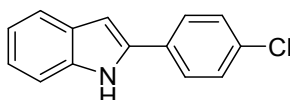

**3af**

**3af**,<sup>[2]</sup> white solid, m.p. 204-205 °C; <sup>1</sup>H NMR (400 MHz, CDCl<sub>3</sub>) δ 8.25 (s, br, 1H), 7.63-7.54 (m, 3H), 7.40-7.30 (m, 3H), 7.24-7.12 (m, 2H), 6.79 (s, 1H); <sup>13</sup>C NMR (100 MHz, CDCl<sub>3</sub>): 136.9, 136.7, 133.4, 130.9, 129.2, 126.3, 122.7, 120.8, 120.5, 110.9,

100.5.

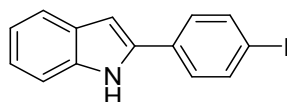

**3ag**

**3ag**,<sup>[2]</sup> white solid, m.p. 220-222 °C; <sup>1</sup>H NMR (400 MHz, CDCl<sub>3</sub>) δ 8.30 (s, br, 1H), 7.74 (d, *J* = 7.6 Hz, 2H), 7.60 (d, *J* = 7.6 Hz, 1H), 7.38 (d, *J* = 8.0 Hz, 3H), 7.20-7.19 (m, 1H), 7.14-7.08 (m, 1H), 6.81 (s, 1H); <sup>13</sup>C NMR (100 MHz, CDCl<sub>3</sub>): 139.5, 137.5, 136.5, 130.8, 128.8, 127.6, 123.2, 121.1, 119.5, 111.7, 102.1.

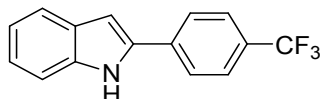

**3ah**

**3ah**,<sup>[2]</sup> white solid, m.p. 240-241 °C; <sup>1</sup>H NMR (400 MHz, CDCl<sub>3</sub>) δ 8.39 (s, br, 1H), 7.78-7.64 (m, 5H), 7.43 (d, *J* = 8.4 Hz, 1H), 7.25-7.22 (m, 1H), 7.17-7.12 (m, 1H), 6.93 (s, 1H); <sup>13</sup>C NMR (100 MHz, CDCl<sub>3</sub>): 138.6, 136.5, 131.7, 130.8, 128.8, 127.5, 123.3, 121.1, 119.5, 118.4, 111.7, 102.3.

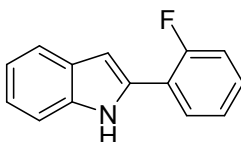

**3ai**

**3ai**,<sup>[2]</sup> white solid, m.p. 208-210 °C; <sup>1</sup>H NMR (400 MHz, CDCl<sub>3</sub>) δ 8.89 (s, br, 1H), 7.83-7.77 (m, 1H), 7.66 (d, *J* = 8.0 Hz, 1H), 7.43 (d, *J* = 8.8 Hz, 1H), 7.32-7.11 (m, 5H), 6.96 (s, 1H); <sup>13</sup>C NMR (100 MHz, CDCl<sub>3</sub>): 159.3(d, *J* = 245 Hz), 136.6, 132.6, 128.9, 128.8, 128.1, 128.0, 124.8, 122.7, 120.7, 120.2, 116.5(d, *J* = 23 Hz), 111.0, 101.6.

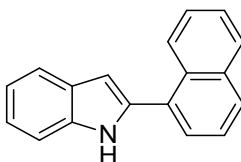

**3aj**

**3aj**,<sup>[2]</sup> white solid, m.p. 199-201 °C; <sup>1</sup>H NMR (400 MHz, CDCl<sub>3</sub>) δ 8.33-8.30 (m, 2H), 7.93-7.87 (m, 2H), 7.71 (d, *J* = 7.6 Hz, 1H), 7.63 (d, *J* = 7.2 Hz, 1H), 7.55-7.51 (m, 3H), 7.44 (d, *J* = 8.0 Hz, 1H), 7.25-7.16 (m, 2H), 6.80 (s, 1H); <sup>13</sup>C NMR (100 MHz, CDCl<sub>3</sub>): 136.7, 136.4, 133.9, 131.5, 128.9, 128.6, 128.5, 127.2, 126.7, 126.2, 125.7, 125.4, 122.2, 120.6, 120.2, 110.9, 103.7; HRMS (EI) calcd for C<sub>18</sub>H<sub>13</sub>N (M) 243.1048, found 243.1039.

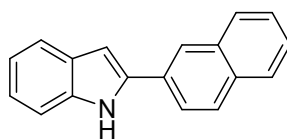

**3ak**

**3ak**,<sup>[2]</sup> white solid, m.p. 195-196 °C; <sup>1</sup>H NMR (400 MHz, CDCl<sub>3</sub>) δ 8.42 (s, br, 1H), 8.00 (s, 1H), 7.88-7.77 (m, 4H), 7.65 (d, *J* = 7.6 Hz, 1H), 7.52-7.38 (m, 3H), 7.22-7.11 (m, 2H), 6.93 (s, 1H); <sup>13</sup>C NMR (100 MHz, CDCl<sub>3</sub>): 137.8, 137.0, 133.6, 132.8, 129.7, 129.3, 128.7, 128.0, 127.8, 126.7, 126.1, 123.8, 123.0, 122.5, 120.7, 120.3, 110.9, 100.7; HRMS (EI) calcd for C<sub>18</sub>H<sub>13</sub>N (M) 243.1048, found 243.1056.

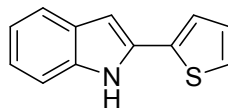

**3al**

**3al**,<sup>[3]</sup> white solid, m.p. 153–155 °C; <sup>1</sup>H NMR (400 MHz, CDCl<sub>3</sub>) δ 8.23 (s, br, 1H), 7.80–7.73 (m, 1H), 7.44–7.40 (m, 1H), 7.39–7.35 (m, 1H), 7.26–7.13 (m, 3H), 7.12–7.087 (m, 1H), 6.90–6.84 (m, 1H); <sup>13</sup>C NMR (100 MHz, CDCl<sub>3</sub>): 137.9, 136.2, 129.8, 129.2, 128.5, 127.3, 127.2, 123.0, 120.8, 119.5, 111.5, 106.8

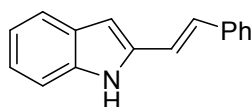

**3am**

**3am**, white solid, m.p. 181–183 °C; <sup>1</sup>H NMR (400 MHz, CDCl<sub>3</sub>) δ 8.27 (s, br, 1H), 7.58 (d, *J* = 7.6 Hz, 1H), 7.50 (d, *J* = 7.6 Hz, 2H), 7.40-7.34 (m, 3H), 7.29-7.26 (m, 1H), 7.21-7.17 (m, 1H), 7.15-7.08 (m, 2H), 6.91 (d, *J* = 16.4 Hz, 1H), 6.62 (s, 1H); <sup>13</sup>C NMR (100 MHz, CDCl<sub>3</sub>): 140.8, 136.6, 133.1, 131.5, 130.2, 128.7, 128.3, 125.8, 125.5, 123.5, 121.4, 119.3, 111.8, 100.3; HRMS (EI) calcd for C<sub>16</sub>H<sub>13</sub>N (M) 219.1048, found 219.1041.

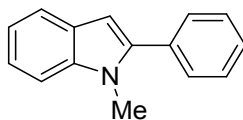

**3bb**

**3bb**,<sup>[2]</sup> white solid, m.p. 99-100 °C; <sup>1</sup>H NMR (400 MHz, CDCl<sub>3</sub>) δ 7.63 (d, *J* = 7.6 Hz, 1H), 7.52-7.33 (m, 6H), 7.25-7.11 (m, 2H), 6.56 (s, 1H), 3.72 (s, 3H); <sup>13</sup>C NMR (100 MHz, CDCl<sub>3</sub>): 141.5, 138.3, 132.8, 129.4, 128.5, 127.9, 127.8, 121.6, 120.5, 119.8, 109.6, 101.6, 31.1.

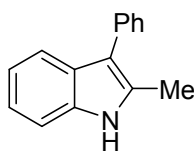

**3cb'**

**3cb'**,<sup>[2]</sup> white solid, m.p. 113–115 °C; <sup>1</sup>H NMR (400 MHz, CDCl<sub>3</sub>) δ 8.14 (s, br, 1H), 7.54 (d, *J* = 7.6 Hz, 1H), 7.30 (d, *J* = 8.0 Hz, 1H), 7.21–7.07 (m, 4H), 7.06–6.97 (m, 3H), 2.46 (s, 3H); <sup>13</sup>C NMR (100 MHz, CDCl<sub>3</sub>) δ 141.1, 139.3, 135.4, 130.3, 128.7, 125.5, 124.5, 122.2, 120.7, 119.0, 110.6, 99.3, 12.1.

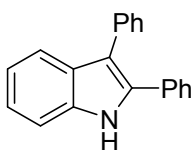

**3db'**

**3db'**,<sup>[2]</sup> colorless oil; <sup>1</sup>H NMR (400 MHz, CDCl<sub>3</sub>) δ 8.52 (s, br, 1H), 7.75–7.70 (m, 2H), 7.62 (d, *J* = 7.6 Hz, 1H), 7.43–6.98 (m, 11H); <sup>13</sup>C NMR (100 MHz, CDCl<sub>3</sub>) δ 142.1, 139.3, 135.9, 131.5, 131.2, 128.9, 128.8, 128.7, 128.2, 125.6, 124.7, 123.4, 121.2, 120.0, 111.2.

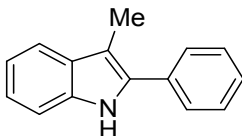**3eb**

**3eb**,<sup>[4]</sup> white solid, m.p. 93-95 °C; <sup>1</sup>H NMR (400 MHz, CDCl<sub>3</sub>) δ 8.02 (s, br, 1H), 7.61-7.56 (m, 2H), 7.52-7.44 (m, 3H), 7.43-7.43 (m, 2H), 7.22-7.12 (m, 2H), 2.46 (s, 3H); <sup>13</sup>C NMR (100 MHz, CDCl<sub>3</sub>): 135.8, 134.0, 130.0, 128.8, 128.6, 127.7, 127.3, 122.3, 119.5, 119.0, 110.7, 108.7, 9.6.

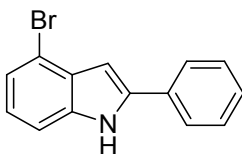**3fb**

**3fb**,<sup>[4]</sup> white solid, m.p. 160-162 °C; <sup>1</sup>H NMR (400 MHz, CDCl<sub>3</sub>) δ 8.44 (s, br, 1H), 7.72 (d, *J* = 7.2 Hz, 1H), 7.65 (d, *J* = 8.4 Hz, 1H), 7.52-7.27 (m, 5H), 7.18 (d, *J* = 7.6 Hz, 1H), 7.00 (s, 1H); <sup>13</sup>C NMR (100 MHz, CDCl<sub>3</sub>): 139.3, 135.4, 130.3, 128.7, 125.5, 124.5, 122.2, 120.7, 119.0, 110.6, 99.3.

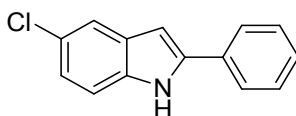**3gb**

**3gb**,<sup>[4]</sup> white solid, m.p. 181-183 °C; <sup>1</sup>H NMR (400 MHz, CDCl<sub>3</sub>) δ 8.33 (s, br, 1H), 7.61 (d, *J* = 7.6 Hz, 1H), 7.42 (d, *J* = 7.6 Hz, 2H), 7.34-7.20 (m, 4H), 7.18-7.15 (m, 1H), 6.73 (s, 1H); <sup>13</sup>C NMR (100 MHz, CDCl<sub>3</sub>): 139.1, 135.4, 131.7, 129.1, 128.1, 127.3, 125.4, 125.1, 123.0, 113.4, 112.4, 99.4.

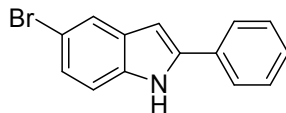**3hb**

**3hb**,<sup>[4]</sup> white solid, m.p. 187-189 °C; <sup>1</sup>H NMR (400 MHz, CDCl<sub>3</sub>) δ 8.33 (s, br, 1H), 7.65-7.11 (m, 7H), 7.10-7.05 (m, 1H), 6.78 (s, 1H); <sup>13</sup>C NMR (100 MHz, CDCl<sub>3</sub>): 139.7, 137.5, 135.0, 129.8, 128.6, 125.7, 124.6, 122.5, 120.5, 119.7, 109.7, 100.5.

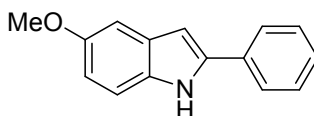**3ib**

**3ib**,<sup>[4]</sup> white solid, m.p. 160-162 °C; <sup>1</sup>H NMR (400 MHz, CDCl<sub>3</sub>) δ 8.23 (s, br, 1H), 7.62 (d, *J* = 7.2 Hz, 2H), 7.44-7.39 (m, 2H), 7.32-7.23 (m, 2H), 7.08 (s, 1H), 6.85 (d, *J* = 8.8 Hz, 1H), 6.75 (s, 1H), 3.86 (s, 3H); <sup>13</sup>C NMR (100 MHz, CDCl<sub>3</sub>): 154.5, 138.6, 132.4, 132.0, 129.7, 129.3, 129.0, 127.7, 125.1, 112.6, 111.7, 102.3, 99.8, 55.9.

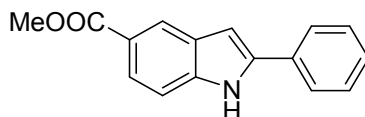

**3jb**

**3jb**,<sup>[4]</sup> white solid, m.p. 183-184 °C; <sup>1</sup>H NMR (400 MHz, CDCl<sub>3</sub>) δ 8.63 (s, br, 1H), 8.32 (s, 1H), 7.84 (d, *J* = 8.4 Hz, 1H), 7.61 (d, *J* = 7.6 Hz, 1H), 7.40-7.31 (m, 4H), 7.25-7.20 (m, 1H), 6.82 (s, 1H), 3.87 (s, 3H); <sup>13</sup>C NMR (100 MHz, CDCl<sub>3</sub>): 167.2, 138.4, 137.4, 130.7, 128.1, 127.2, 124.2, 122.7, 122.5, 122.4, 120.9, 109.6, 99.9, 50.9.

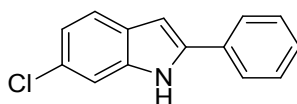

**3kb**

**3kb**,<sup>[4]</sup> white solid, m.p. 171-173 °C; <sup>1</sup>H NMR (400 MHz, CDCl<sub>3</sub>) δ 8.37 (s, br, 1H), 7.65 (d, *J* = 7.2 Hz, 2H), 7.59 (s, 1H), 7.50-7.43 (m, 2H), 7.36-7.25 (m, 2H), 7.14 (d, *J* = 8.4 Hz, 1H), 6.76 (s, 1H); <sup>13</sup>C NMR (100 MHz, CDCl<sub>3</sub>): 139.3, 135.1, 131.9, 130.3, 129.1, 128.1, 125.9, 125.2, 122.6, 120.0, 111.9, 99.6.

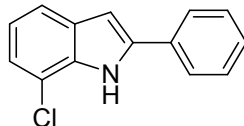

**3lb**

**3lb**, white solid, m.p. 145-147 °C; <sup>1</sup>H NMR (400 MHz, CDCl<sub>3</sub>) δ 8.39 (s, br, 1H), 7.52-7.44 (m, 2H), 7.42 (d, *J* = 1.6 Hz, 1H), 7.20-7.02 (m, 6H); <sup>13</sup>C NMR (100 MHz, CDCl<sub>3</sub>) δ 138.7, 136.8, 131.1, 129.1, 128.8, 127.7, 126.0, 125.0, 121.7, 120.6, 111.6, 103.5; HRMS (ESI) calcd for C<sub>14</sub>H<sub>10</sub>ClN (M) 227.0502, found 227.0520.

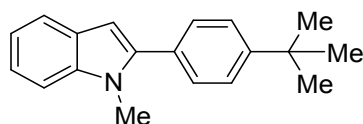

**3bc**

**3bc**, white solid, m.p. 112-114 °C; <sup>1</sup>H NMR (400 MHz, CDCl<sub>3</sub>) δ 7.62 (d, *J* = 7.6 Hz, 1H), 7.49-7.42 (m, 4H), 7.33 (d, *J* = 8.0 Hz, 1H), 7.24-7.10 (m, 2H), 6.54 (s, 1H), 3.72 (s, 3H), 1.37 (s, 9H); <sup>13</sup>C NMR (100 MHz, CDCl<sub>3</sub>): 150.8, 141.6, 138.2, 129.9, 129.0, 125.4, 121.4, 120.3, 119.7, 109.5, 101.3, 34.6, 31.3, 31.1; HRMS (EI) calcd for C<sub>19</sub>H<sub>21</sub>N (M) 263.1674, found 263.1661.

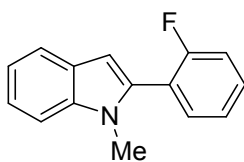

**3bi**

**3bi**, <sup>[4]</sup> white solid, m.p. 119-121 °C; <sup>1</sup>H NMR (400 MHz, CDCl<sub>3</sub>) δ 7.65 (d, *J* = 7.6 Hz, 1H), 7.48-7.36 (m, 3H), 7.28-7.12 (m, 4H), 6.58 (s, 1H), 3.67 (s, 3H); <sup>13</sup>C NMR (100 MHz, CDCl<sub>3</sub>): 160.1 (d, *J* = 246.7 Hz), 138.0, 135.4, 132.5, 132.4, 127.8, 130.3 (d, *J* = 8.0 Hz), 124.3, 121.9, 120.6, 119.8, 115.9 (d, *J* = 21.9 Hz), 109.6, 102.8, 30.9.

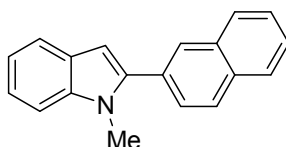

**3bk**

**3bk**, white solid, m.p. 158-160 °C; <sup>1</sup>H NMR (400 MHz, CDCl<sub>3</sub>) δ 7.94 (s, 1H), 7.92-7.85 (m, 3H), 7.67-7.60 (m, 2H), 7.52-7.49 (m, 2H), 7.37 (d, *J* = 7.6 Hz, 1H), 7.28-7.24 (m, 1H), 7.19-7.13 (m, 1H), 6.66 (s, 1H), 3.77 (s, 3H); <sup>13</sup>C NMR (100 MHz, CDCl<sub>3</sub>): 141.5, 138.5, 133.2, 132.7, 130.2, 128.3, 128.1, 128.0, 127.7, 127.2, 126.5, 126.4, 121.8, 120.5, 119.9, 109.6, 102.1, 31.3; HRMS (EI) calcd for C<sub>19</sub>H<sub>15</sub>N (M) 257.1204, found 257.1217.

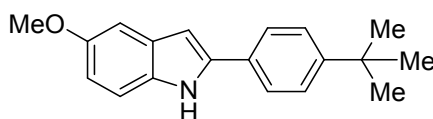

**3ic**

**3ic**, white solid, m.p. 248-250 °C; <sup>1</sup>H NMR (400 MHz, CDCl<sub>3</sub>) δ 8.19 (s, br, 1H), 7.53 (d, *J* = 8.4 Hz, 2H), 7.42 (d, *J* = 8.4 Hz, 2H), 7.22 (d, *J* = 8.8 Hz, 1H), 7.08 (s, 1H), 6.83 (d, *J* = 8.8 Hz, 1H), 6.70 (s, 1H), 3.84 (s, 3H), 1.34 (s, 9H); <sup>13</sup>C NMR (100 MHz, CDCl<sub>3</sub>): 154.4, 150.7, 138.7, 131.9, 129.8, 129.6, 125.9, 124.8, 112.3, 111.6, 102.2, 99.3, 55.8, 34.6, 31.2; HRMS (EI) calcd for C<sub>19</sub>H<sub>21</sub>NO (M) 279.1263, found 279.1269.

### ESI-MS Analysis of the mixture of p-toluenesulfonyl hydrazide (1a) and Pd(OAc)<sub>2</sub> in DMSO

To a solution of sulfonyl hydrazide **2a** (37.3 mg, 0.20 mmol) in DMSO (1.0 mL) were added Pd(OAc)<sub>2</sub> (2.2 mg, 0.010 mmol). The resulting mixture was stirred at 70 °C for 10 minutes. The mixture was cooled to room temperature, and subjected to ESI-MS (positive mode) spectroscopic analysis at room temperature. Copied below is the ESI-MS spectrum we obtained.



20110617\_HESI+\_TIANSK\_YFL07\_11\_02 #18 RT: 0.24 AV: 1 NL: 3.47E8  
T: FTMS + c ESI Full ms [100.00-1000.00]

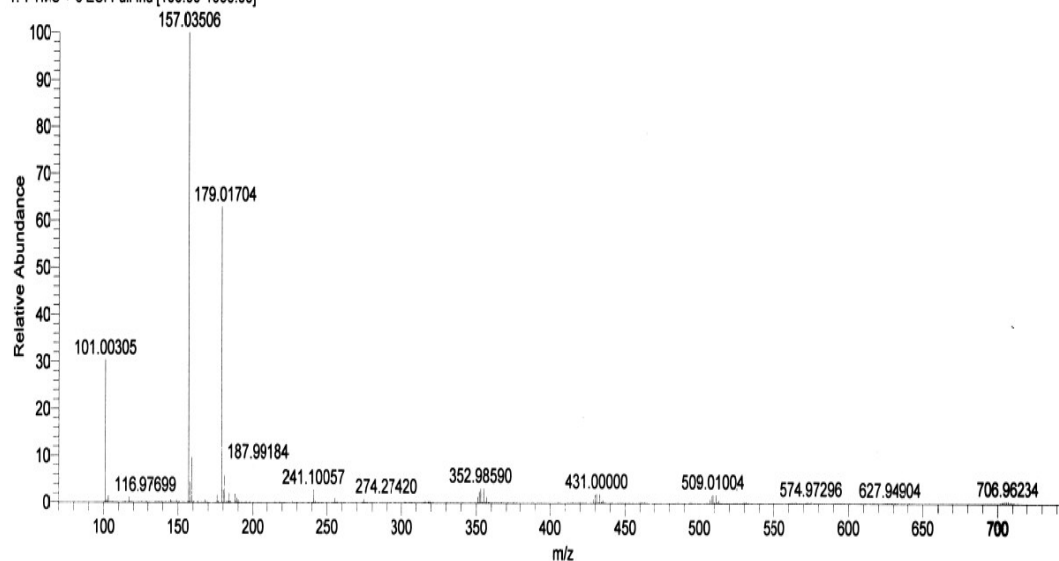

20110617\_HESI+\_TIANSK\_YFL07\_11\_02

6/17/2011 10:36:23 AM

20110617\_HESI+\_TIANSK\_YFL07\_11\_02 #18 RT: 0.24 AV: 1 NL: 1.10E7  
T: FTMS + c ESI Full ms [100.00-1000.00]

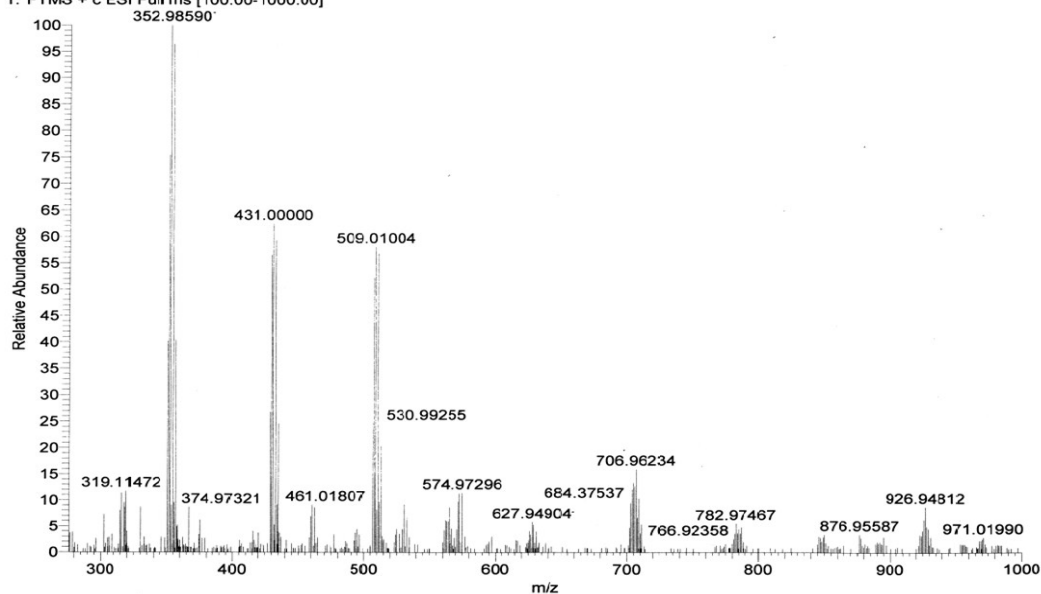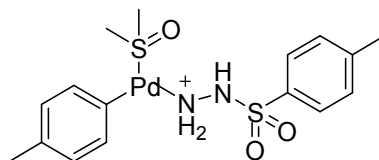**10a**

**10a:** HRMS (ESI) calcd for  $C_{16}H_{23}N_2O_3PdS_2^+$  (M) 461.01794, found 461.01807.

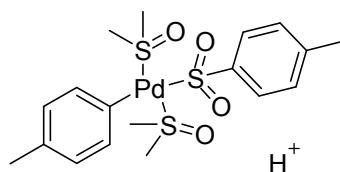**(11a + H)<sup>+</sup>**

(**11a**+H)<sup>+</sup>: HRMS (ESI) calcd for C<sub>18</sub>H<sub>27</sub>O<sub>4</sub>PdS<sub>3</sub><sup>+</sup> (M+H)<sup>+</sup> 509.01008, found 509.01004.

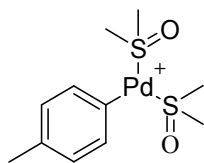

**12a**

**12a**: HRMS (ESI) calcd for C<sub>11</sub>H<sub>19</sub>O<sub>2</sub>PdS<sub>2</sub><sup>+</sup> (M) 352.98558, found 352.98590.

## References

1. A. G. Myers, B. Zheng and M. Movassaghi, *J. Org. Chem.* 1997, **62**, 7507.
2. S. D. Yang, C. L. Sun, Z. Fang, B. J. Li, Y. Z. Li and Z. J. Shi, *Angew. Chem. Int. Ed.* 2008, **47**, 1473.
3. G. A. Kraus and H. T. Guo, *Org. Lett.* 2008, **10**, 3061.
4. S. Isiam and I. Larrosa, *Chem. Eur. J.* 2013, **19**, 15093.

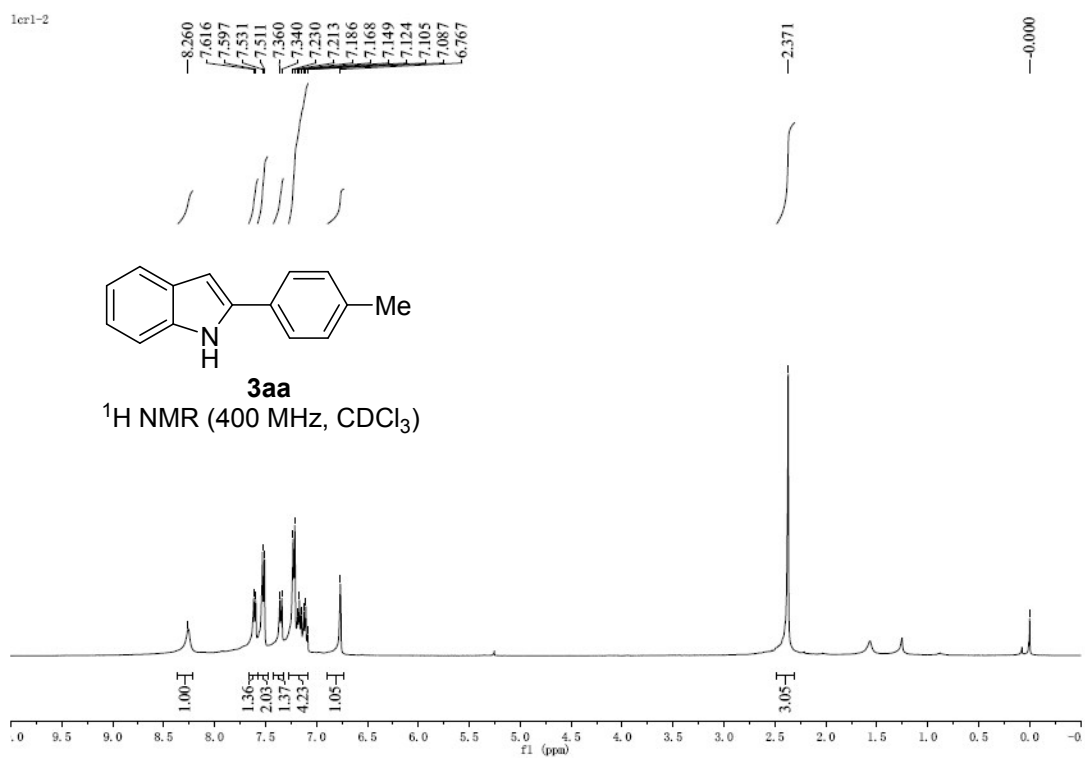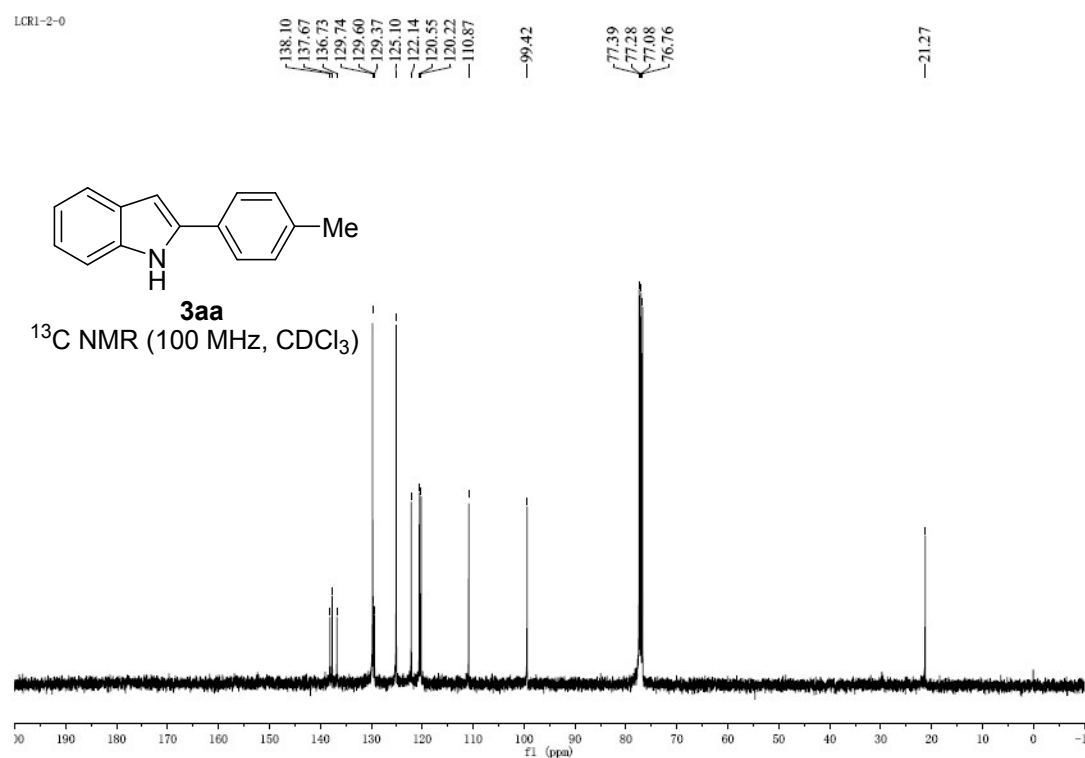

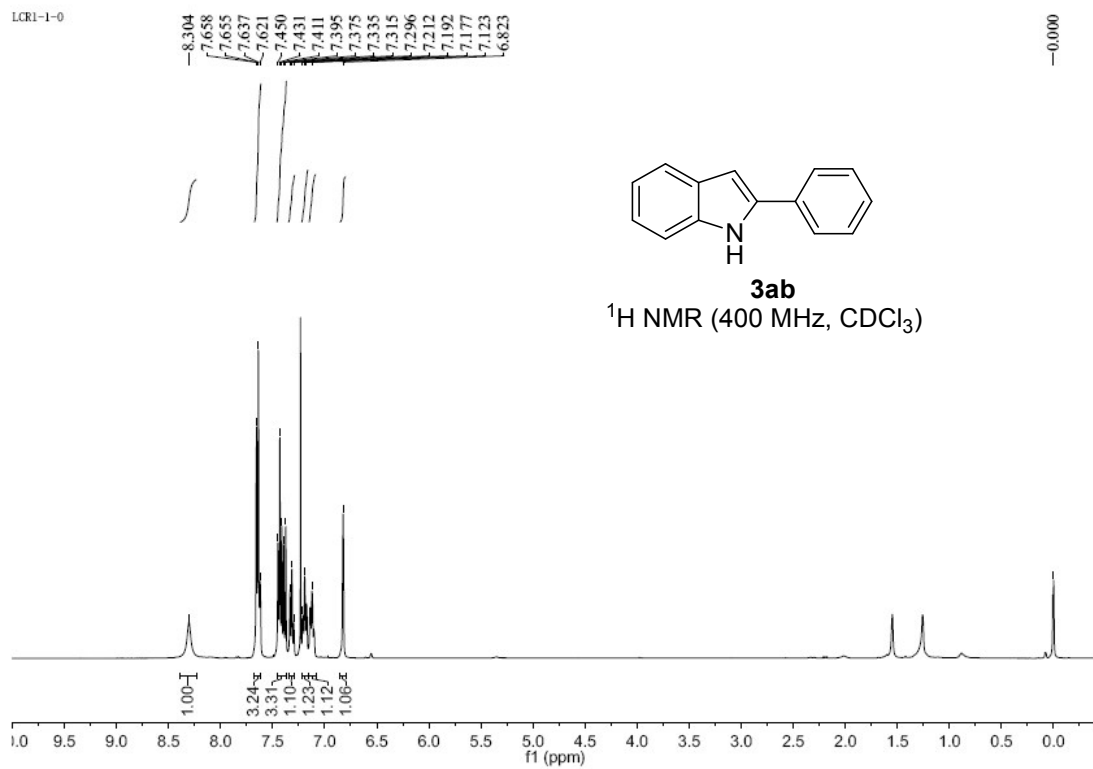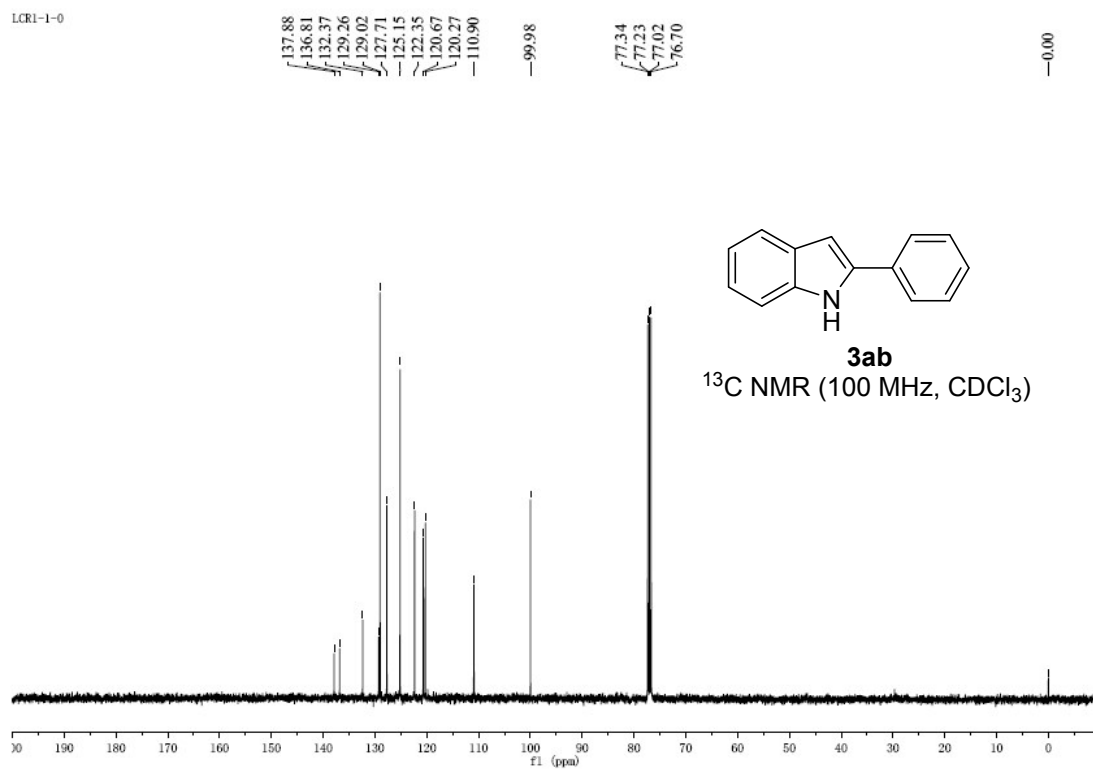

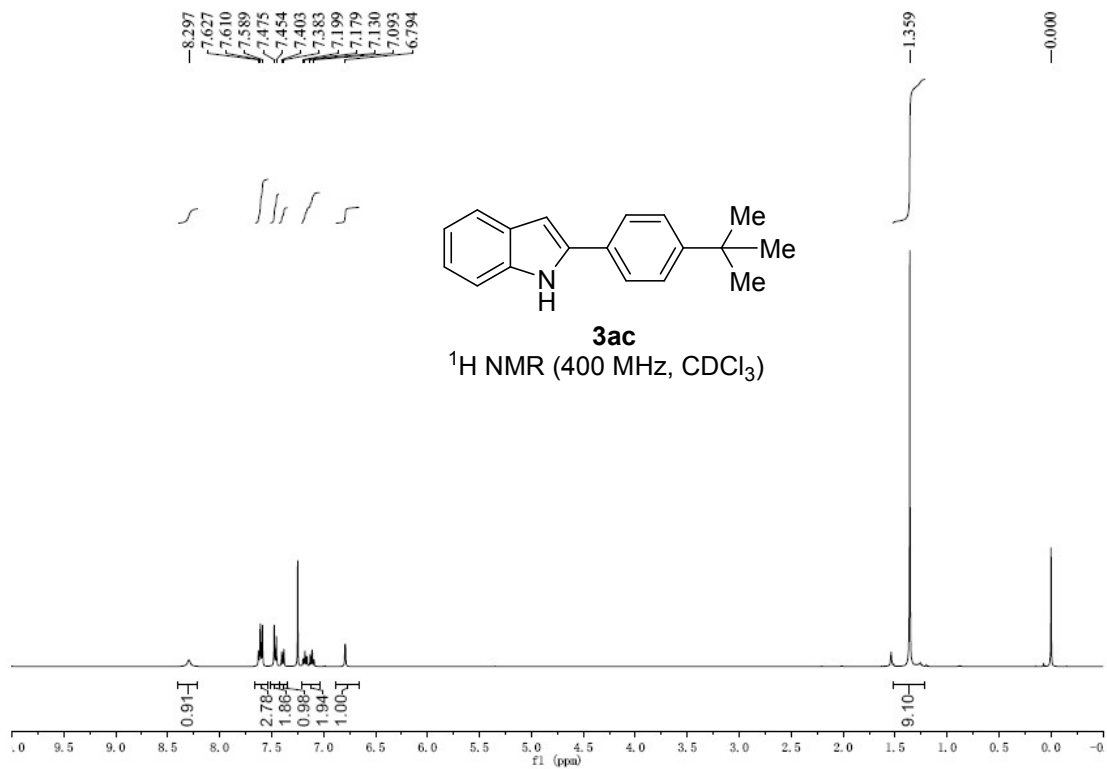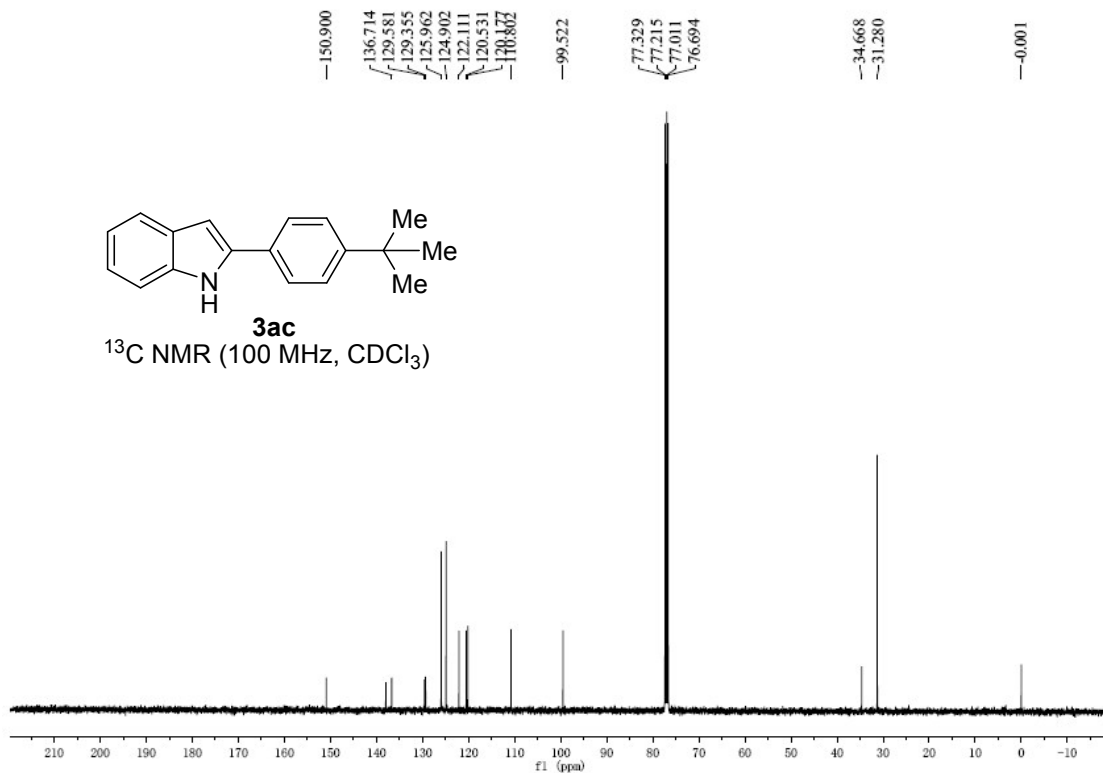

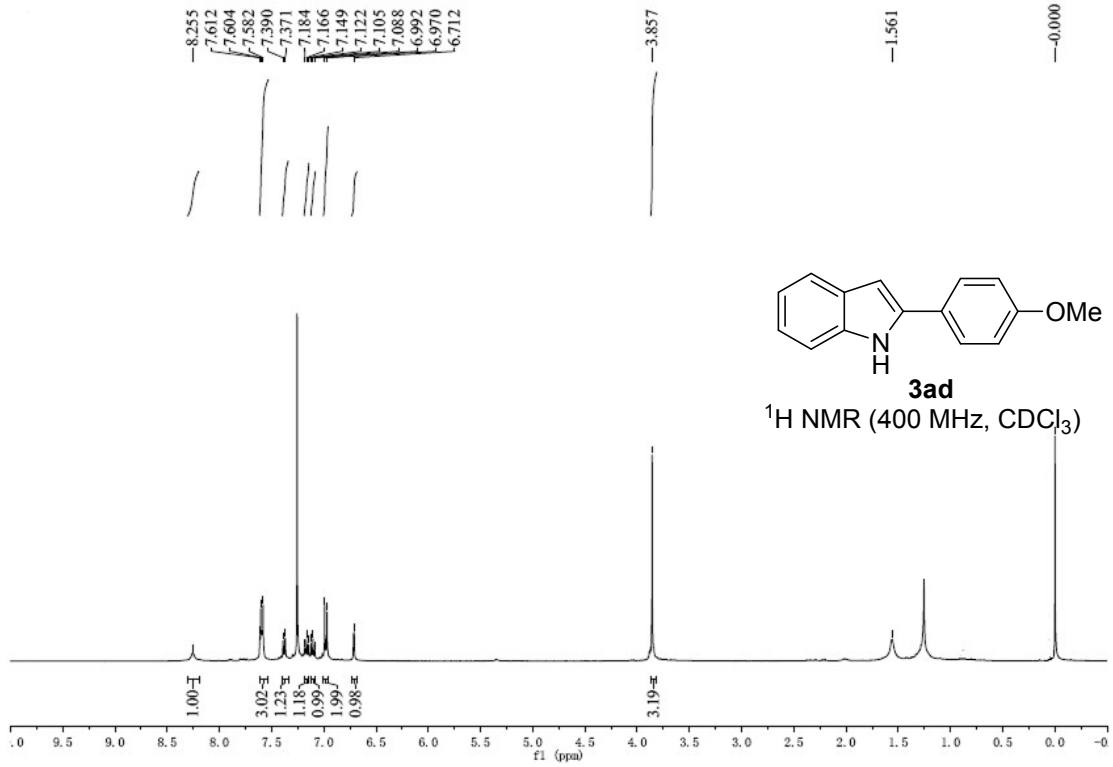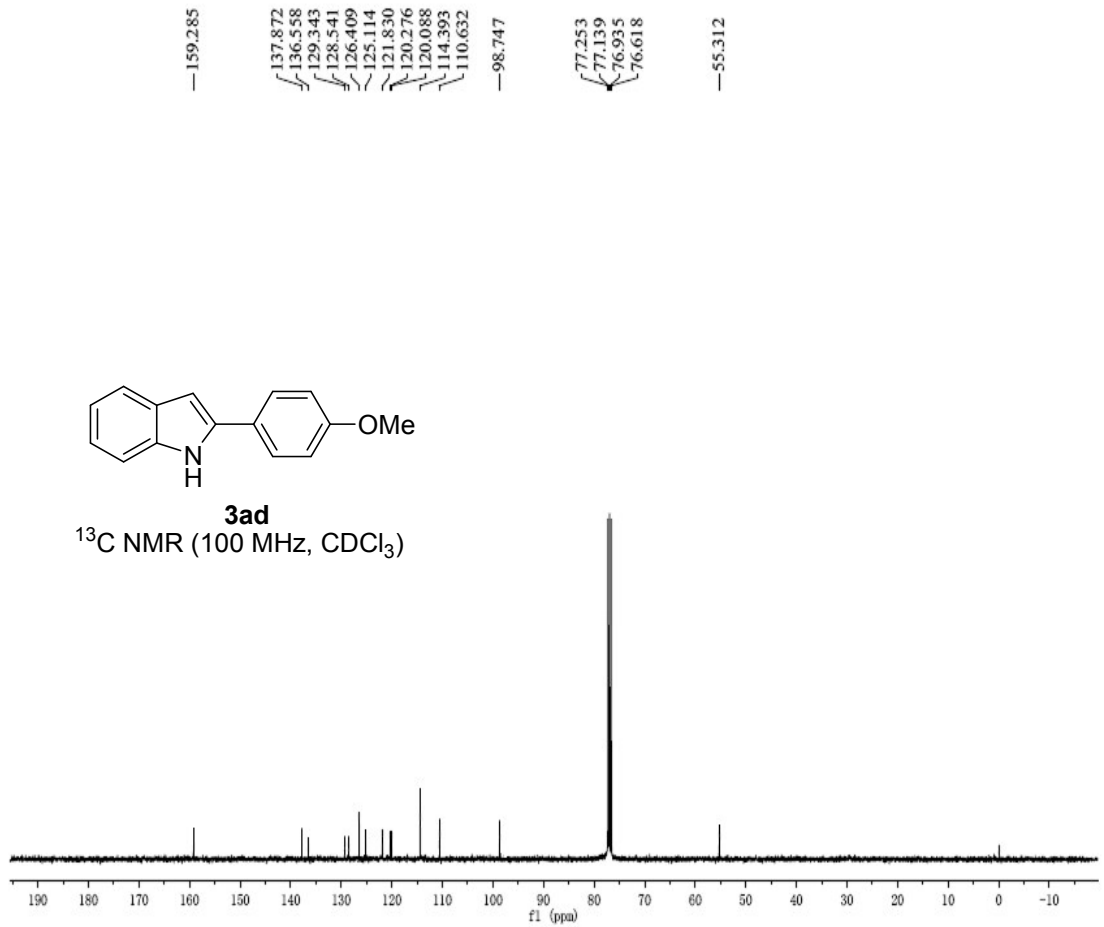

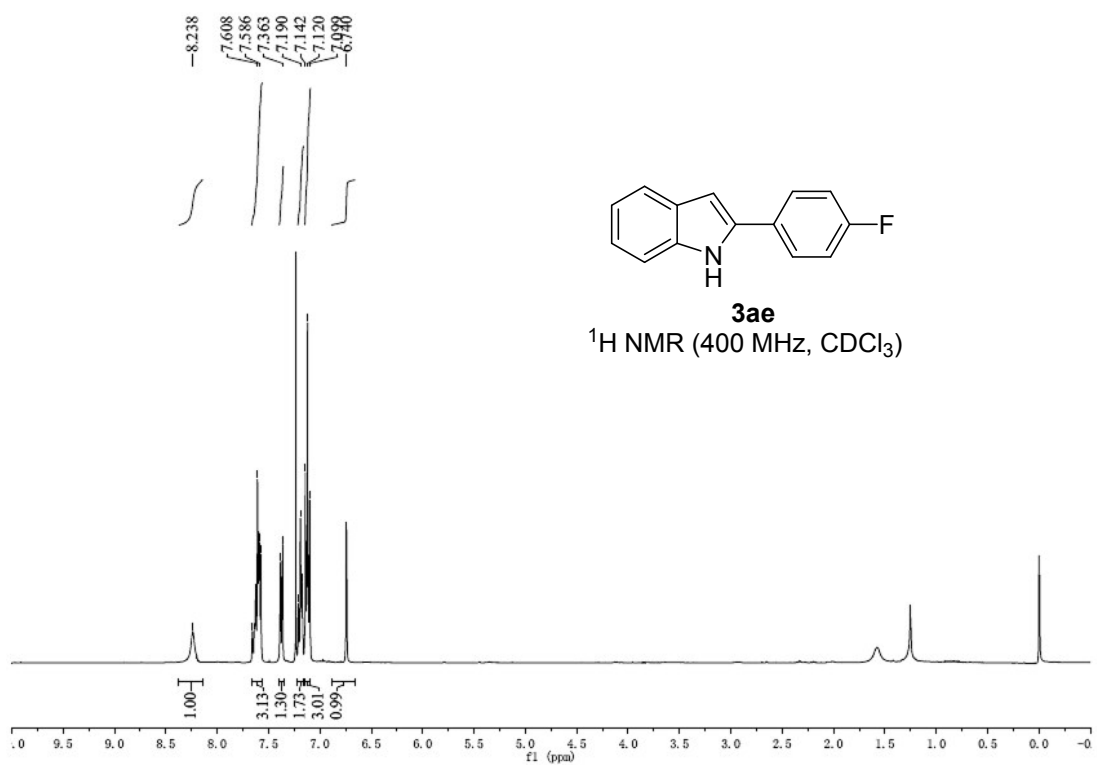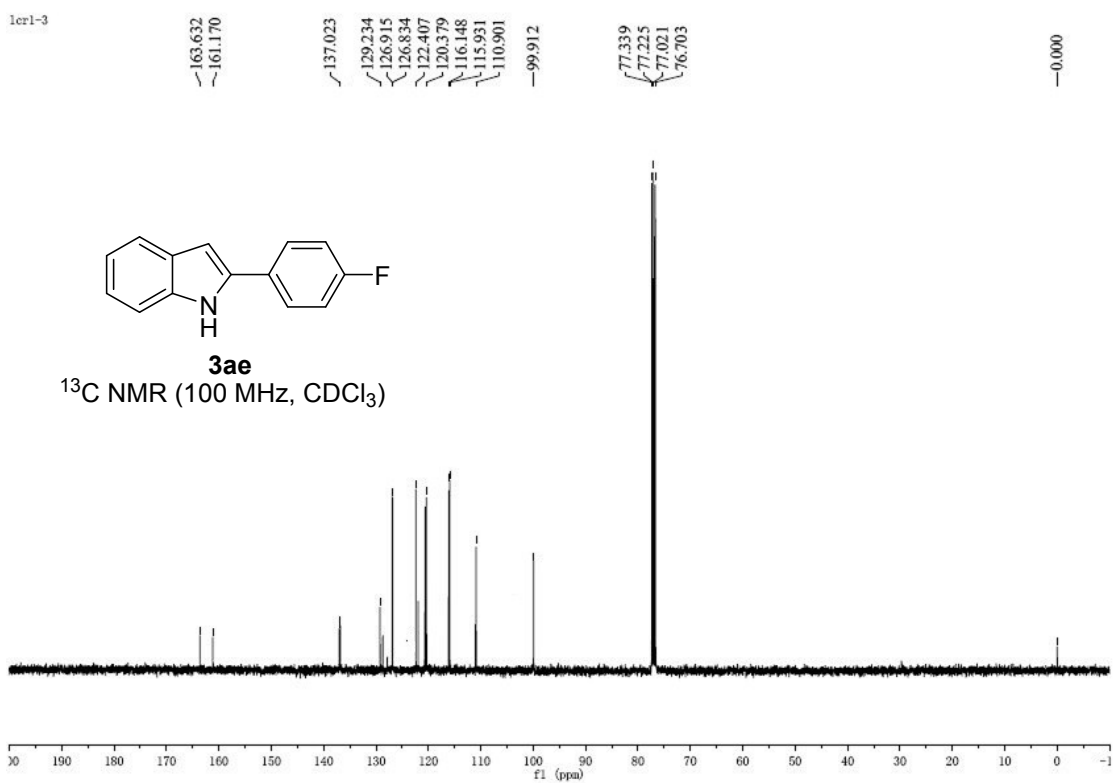

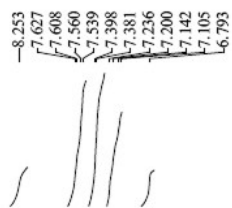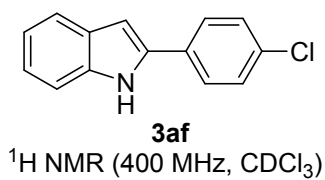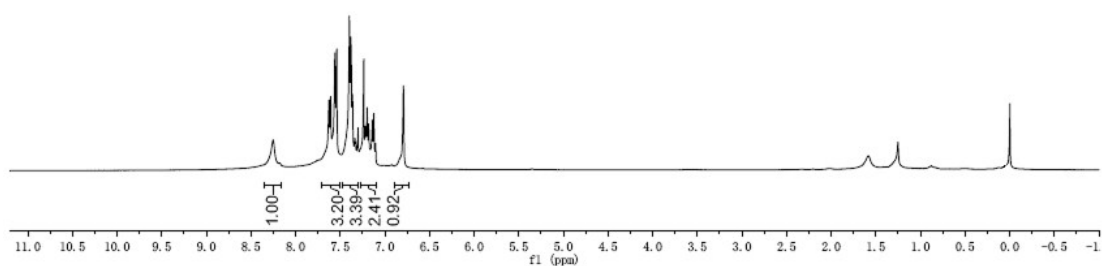

1cr2-4

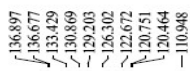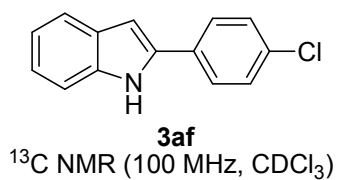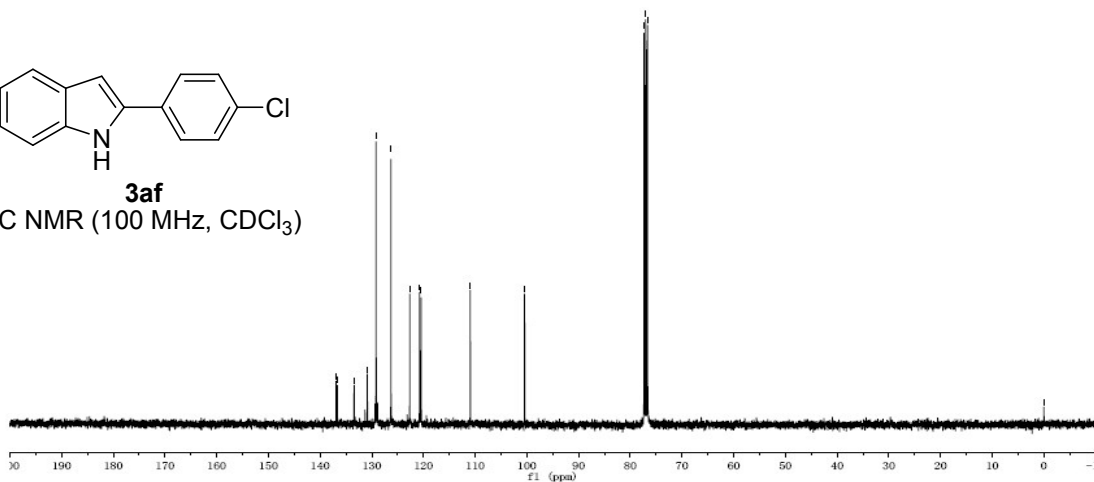



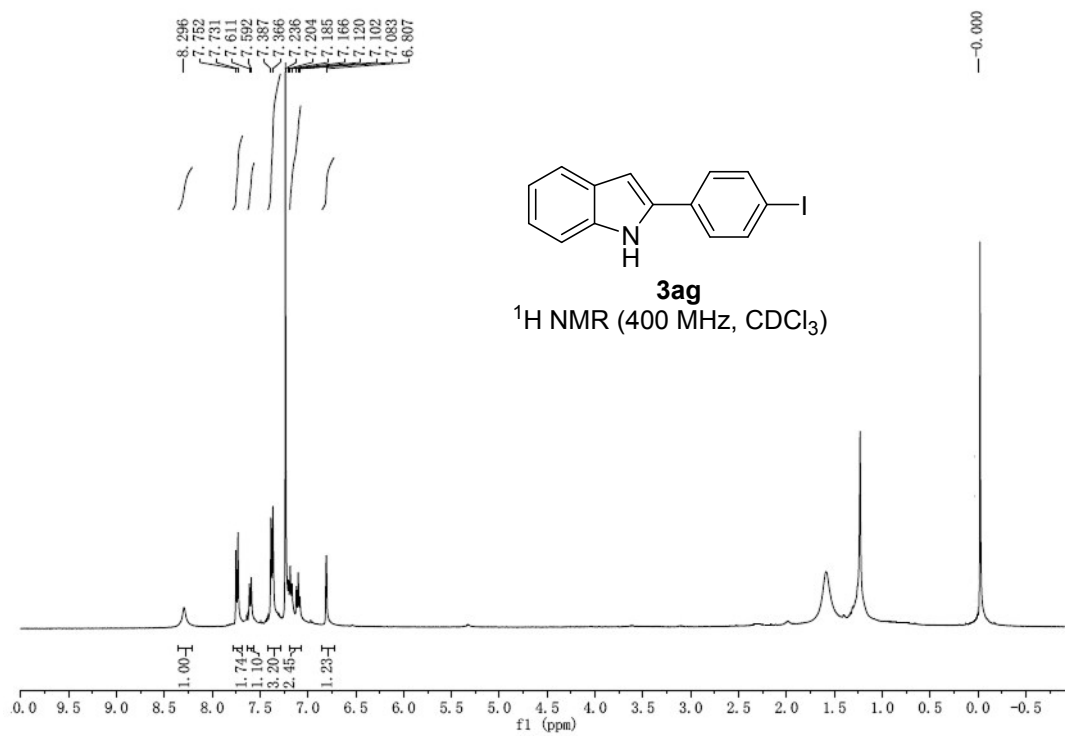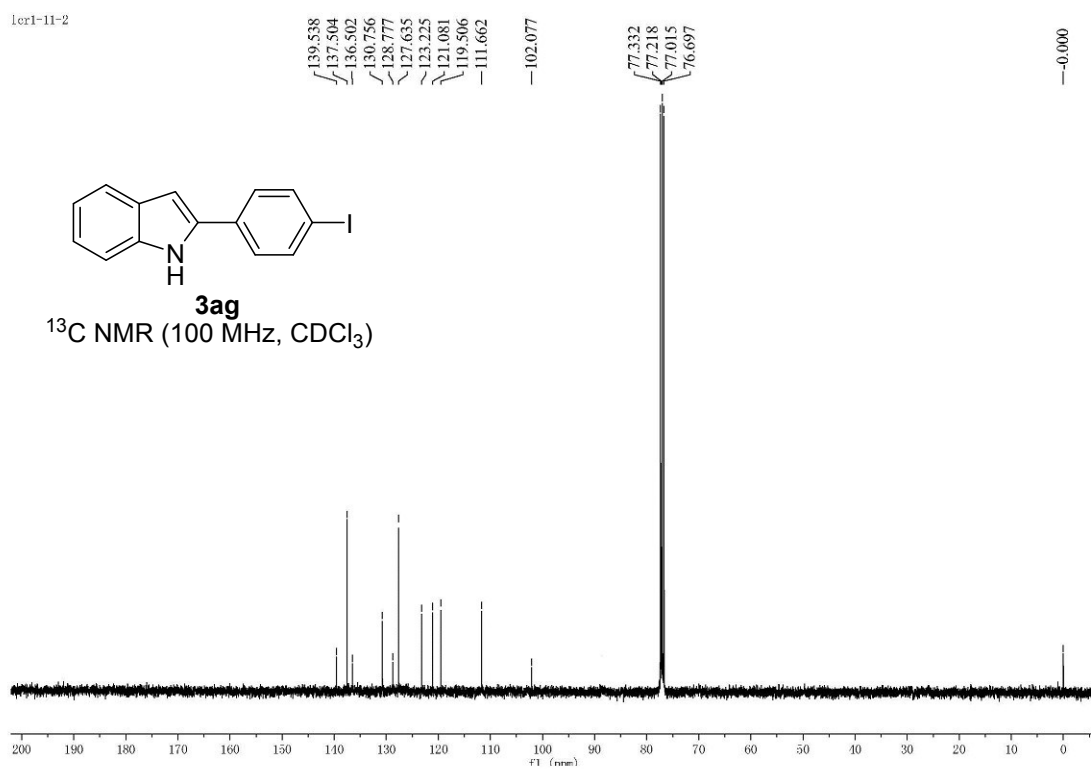

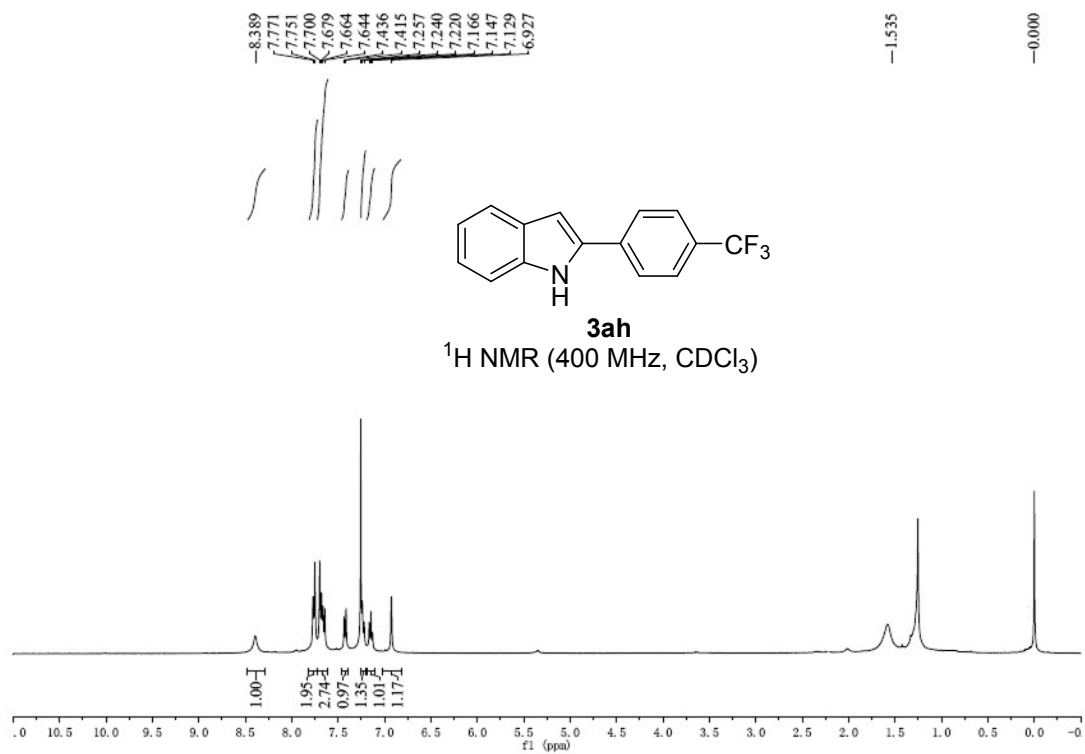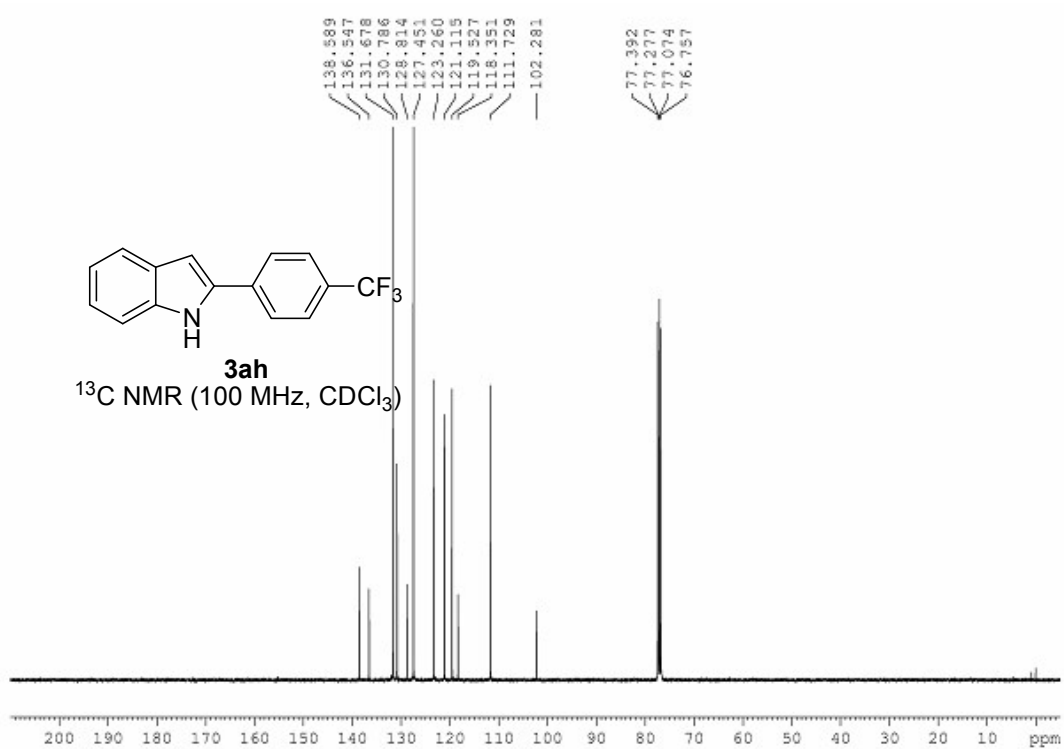

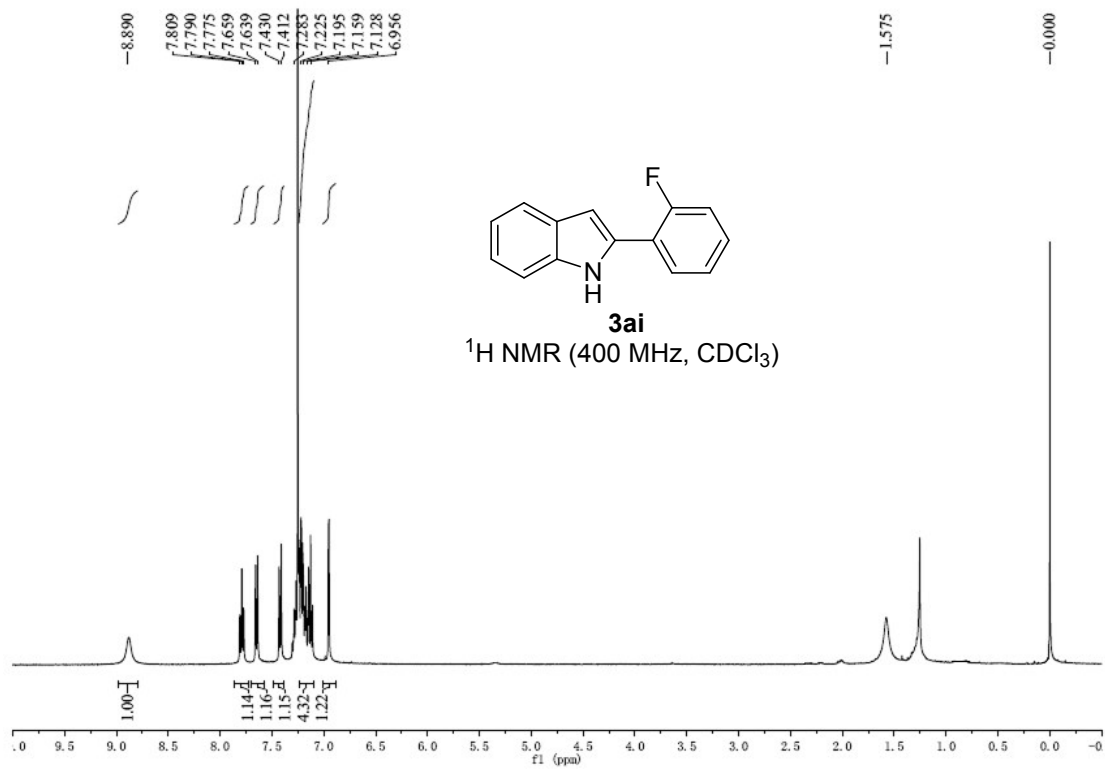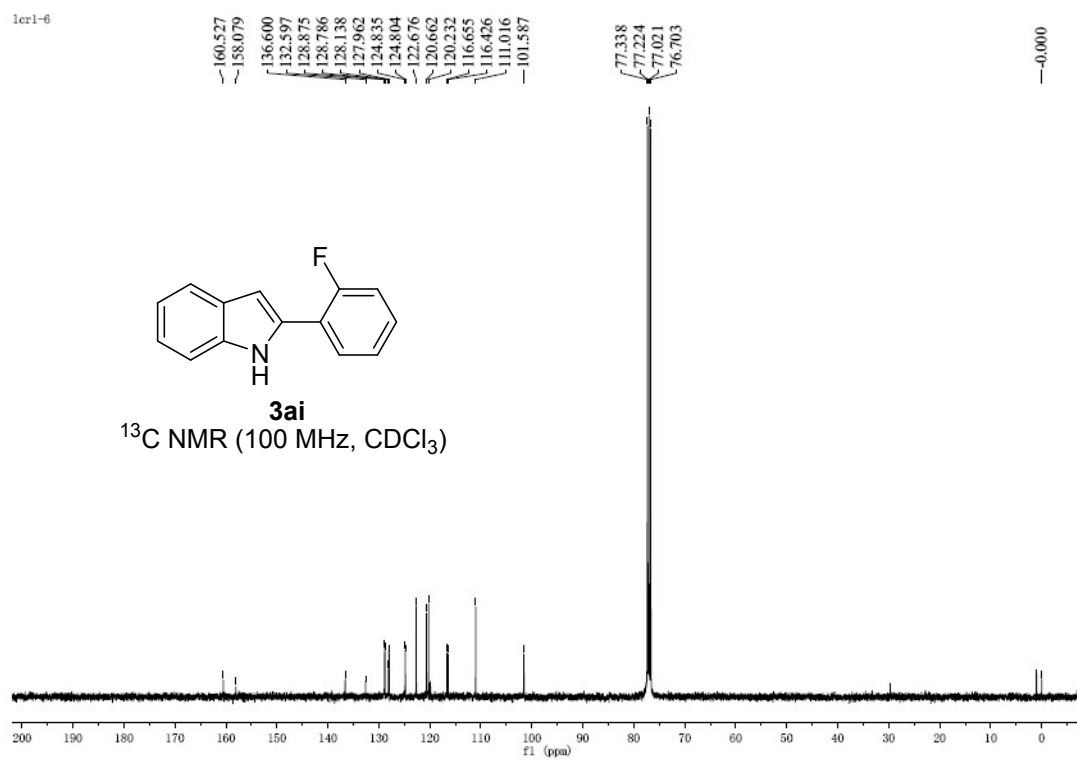

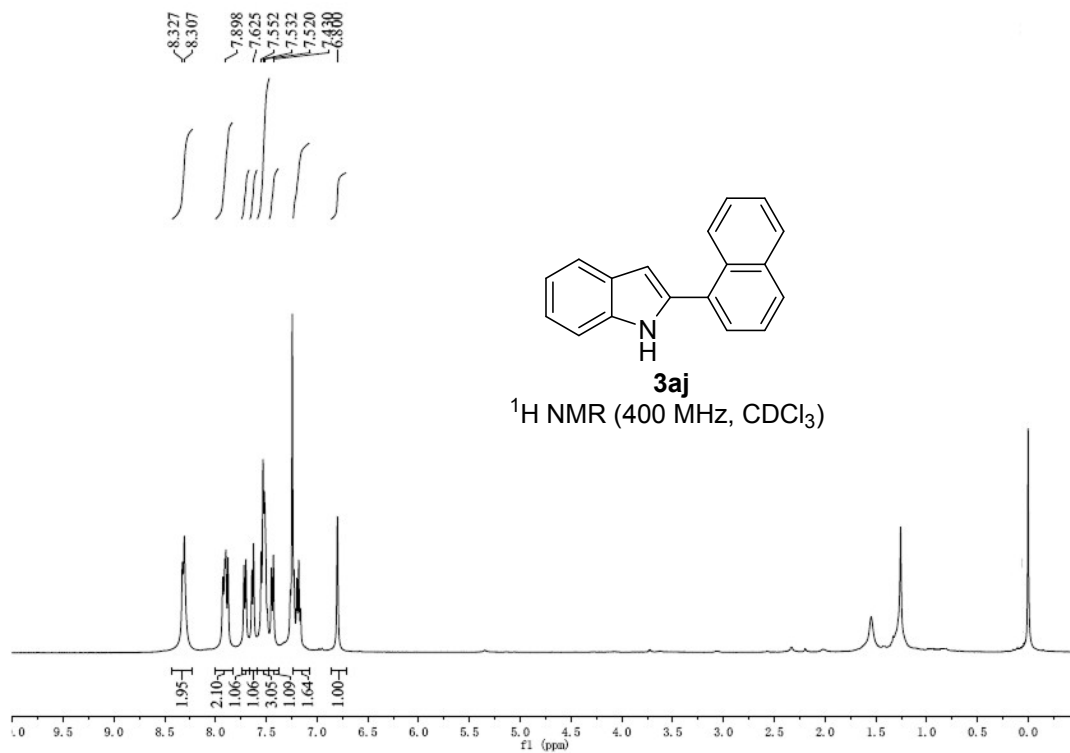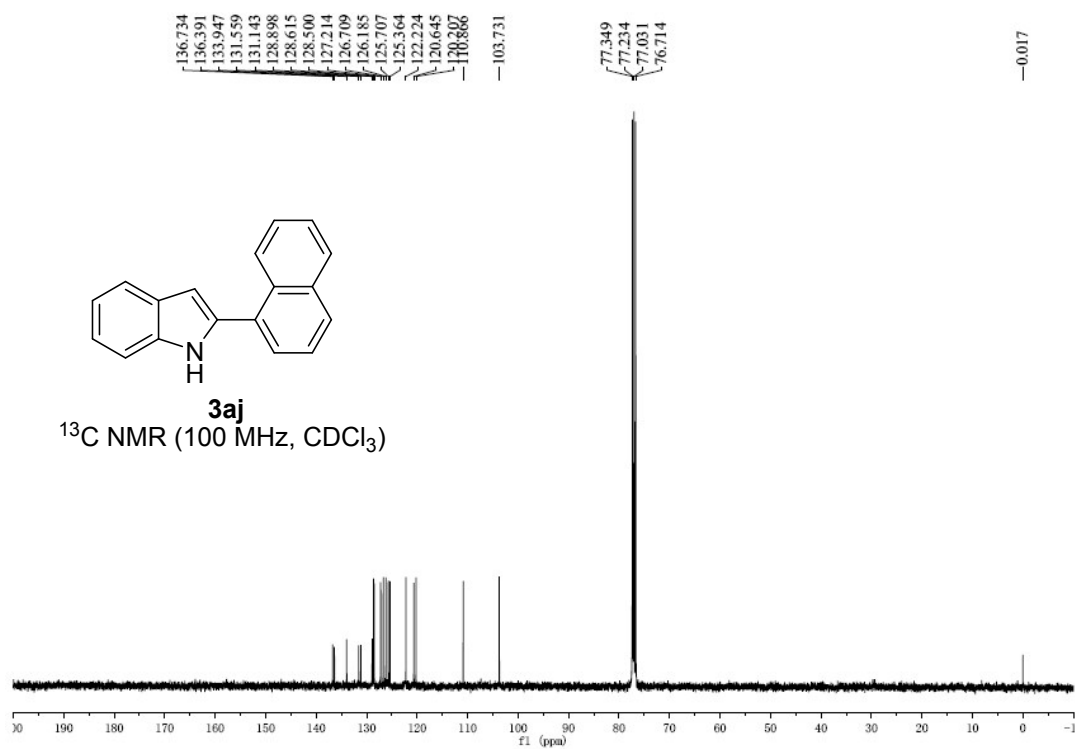

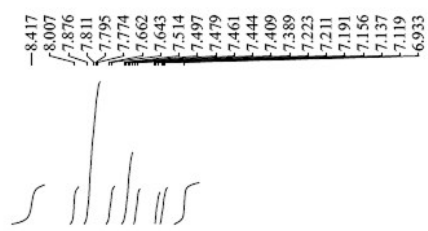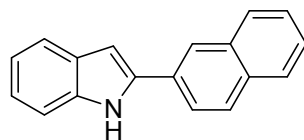

**3ak**

<sup>1</sup>H NMR (400 MHz, CDCl<sub>3</sub>)

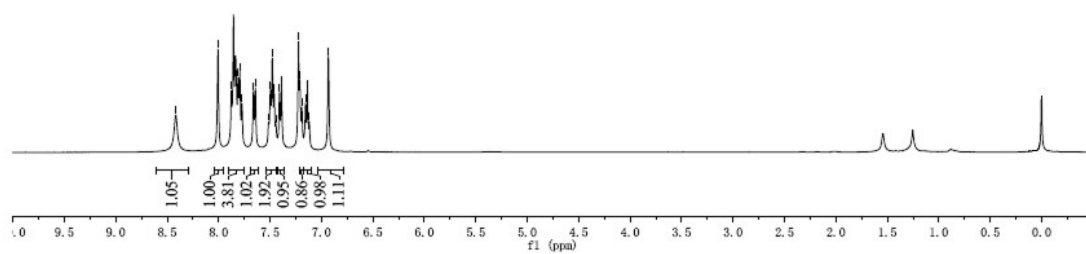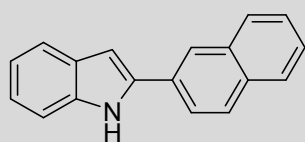

**3ak**

<sup>13</sup>C NMR (100 MHz, CDCl<sub>3</sub>)

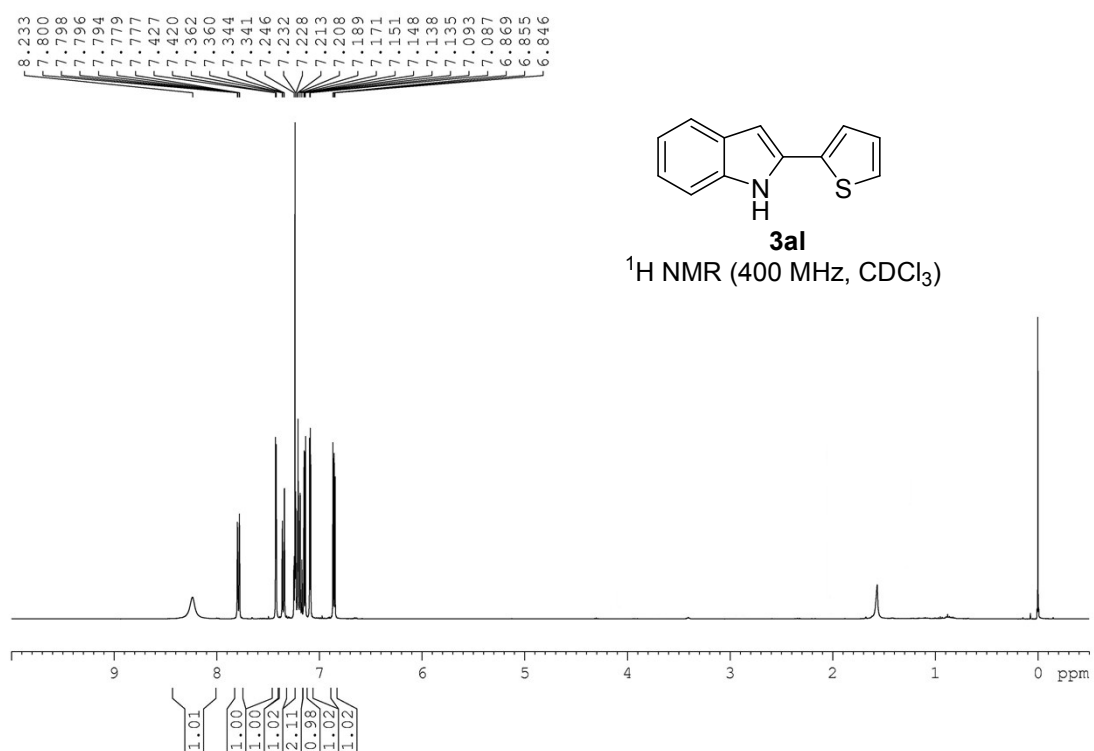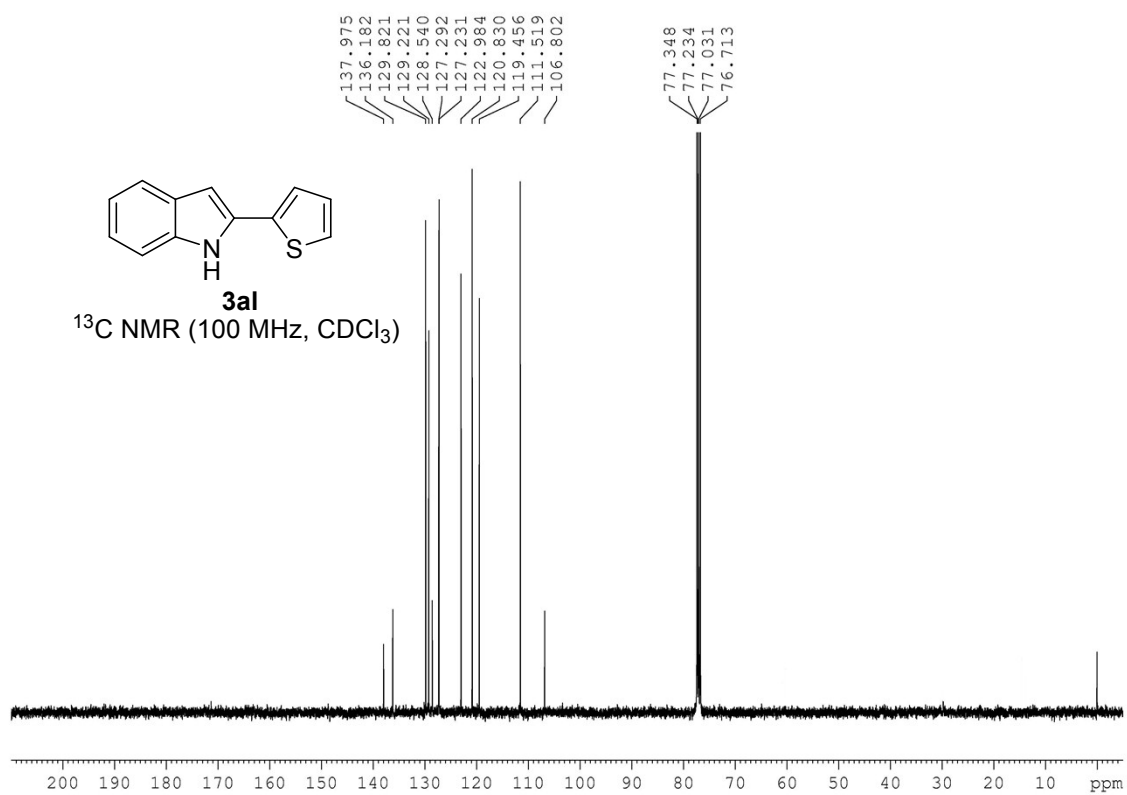

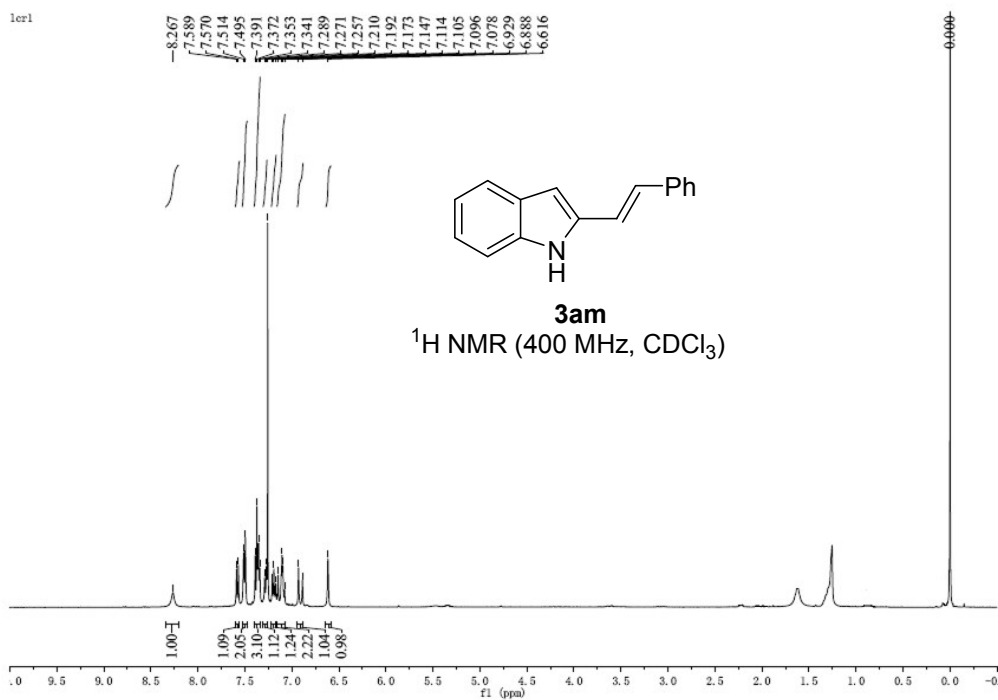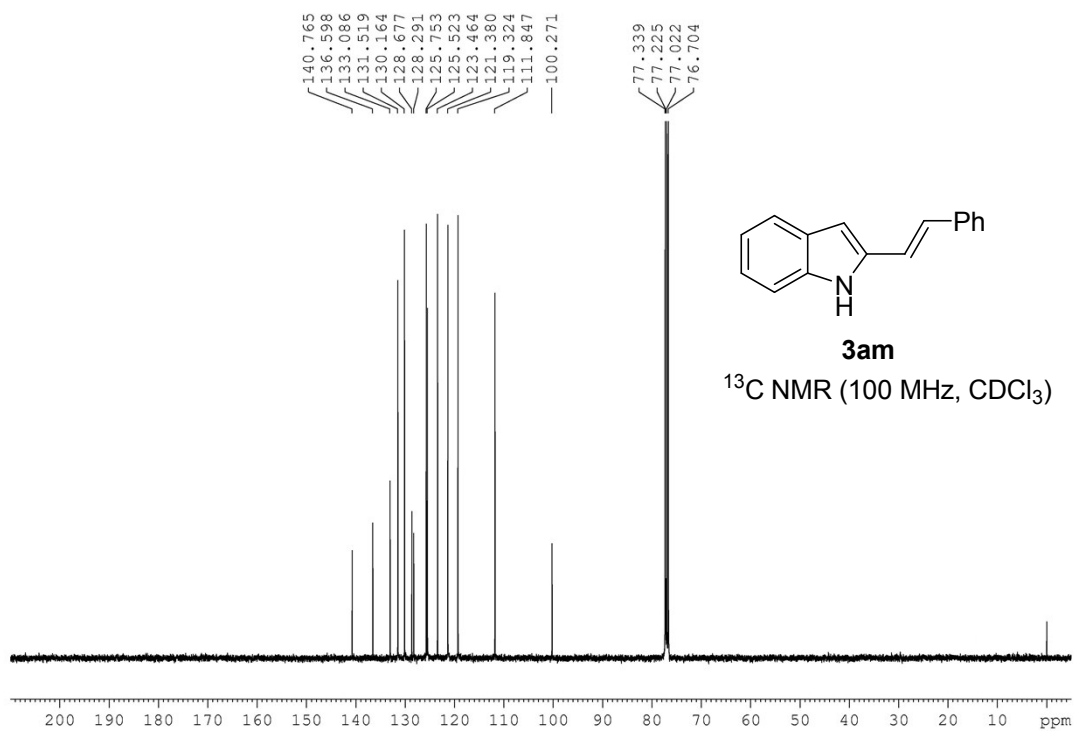

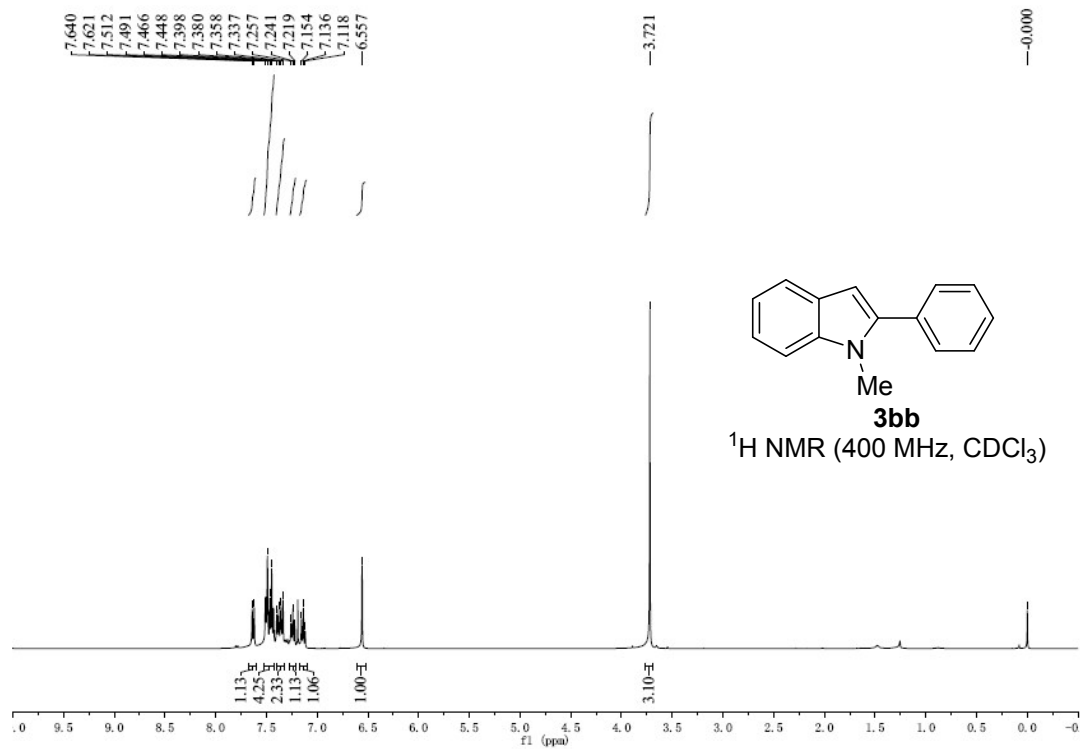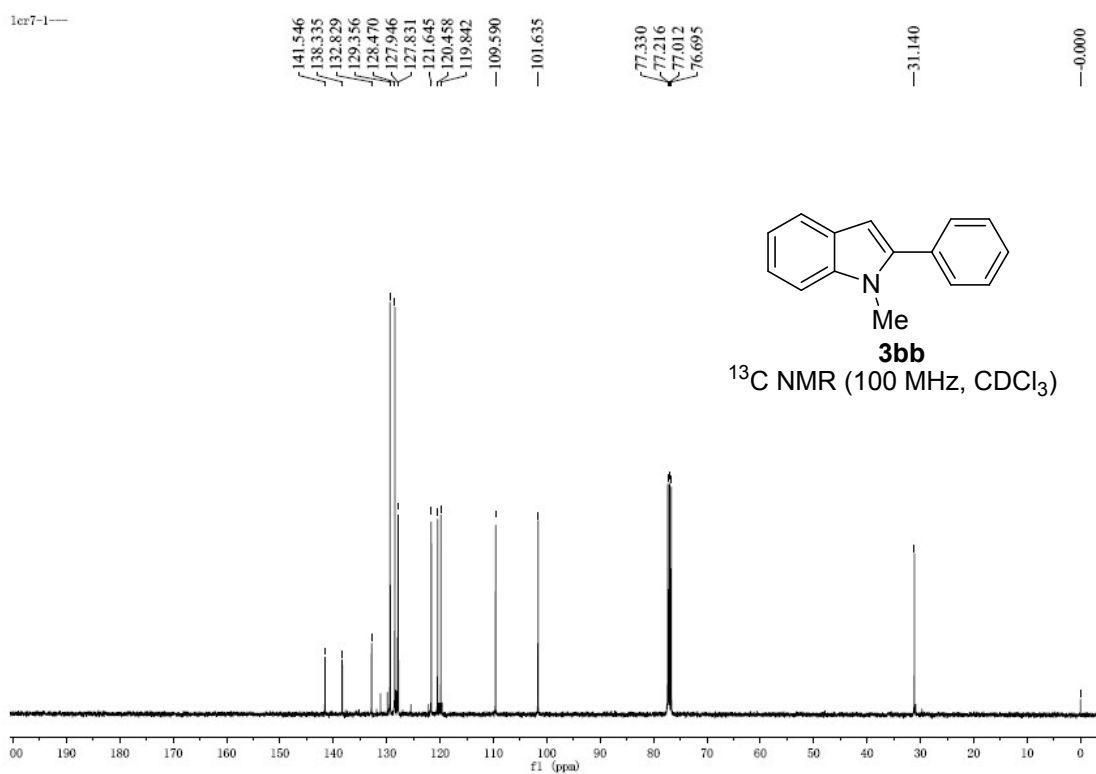



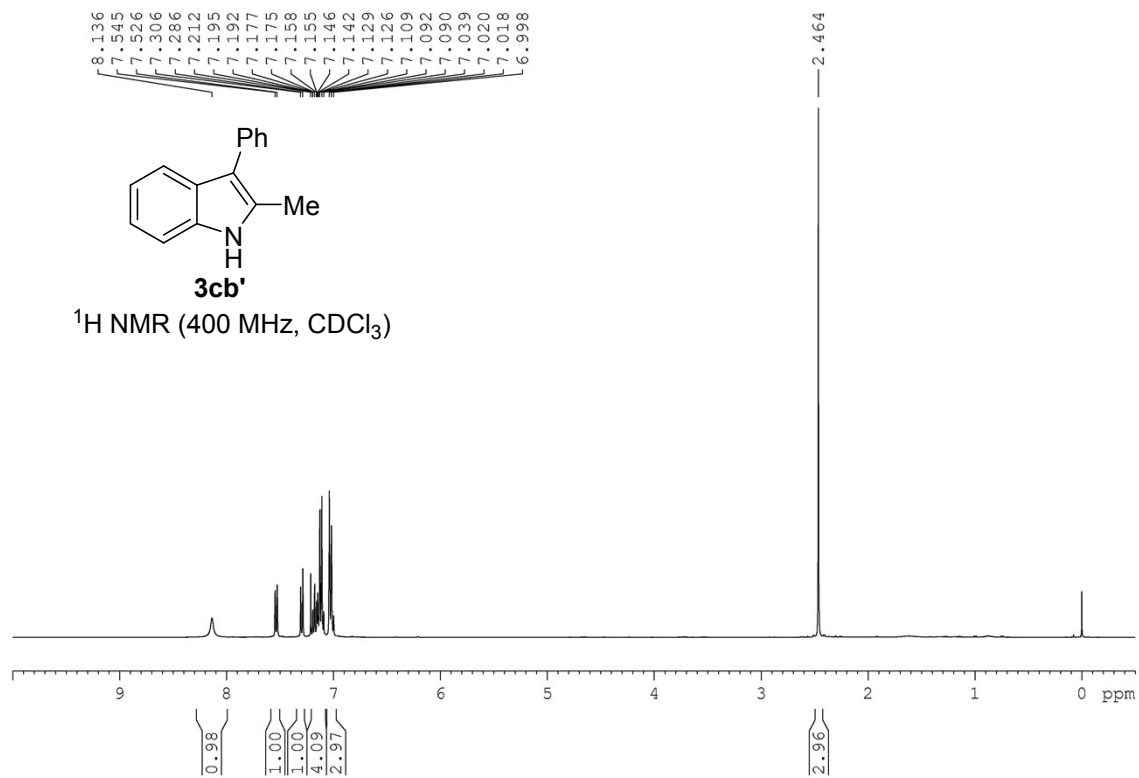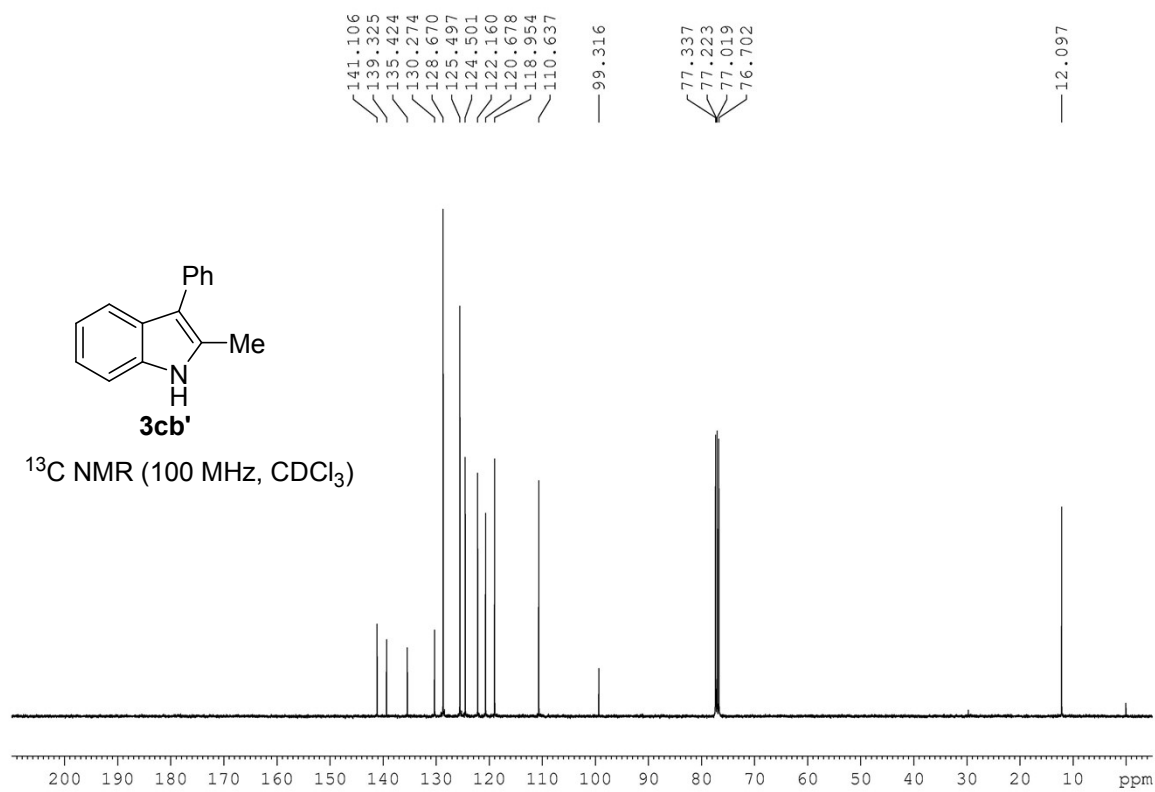

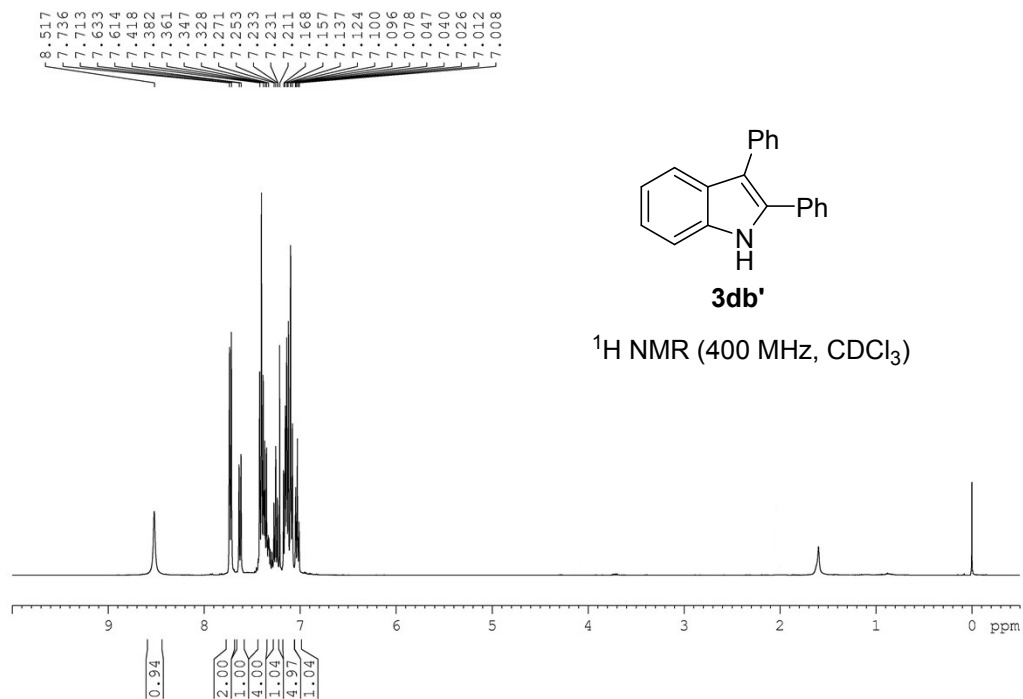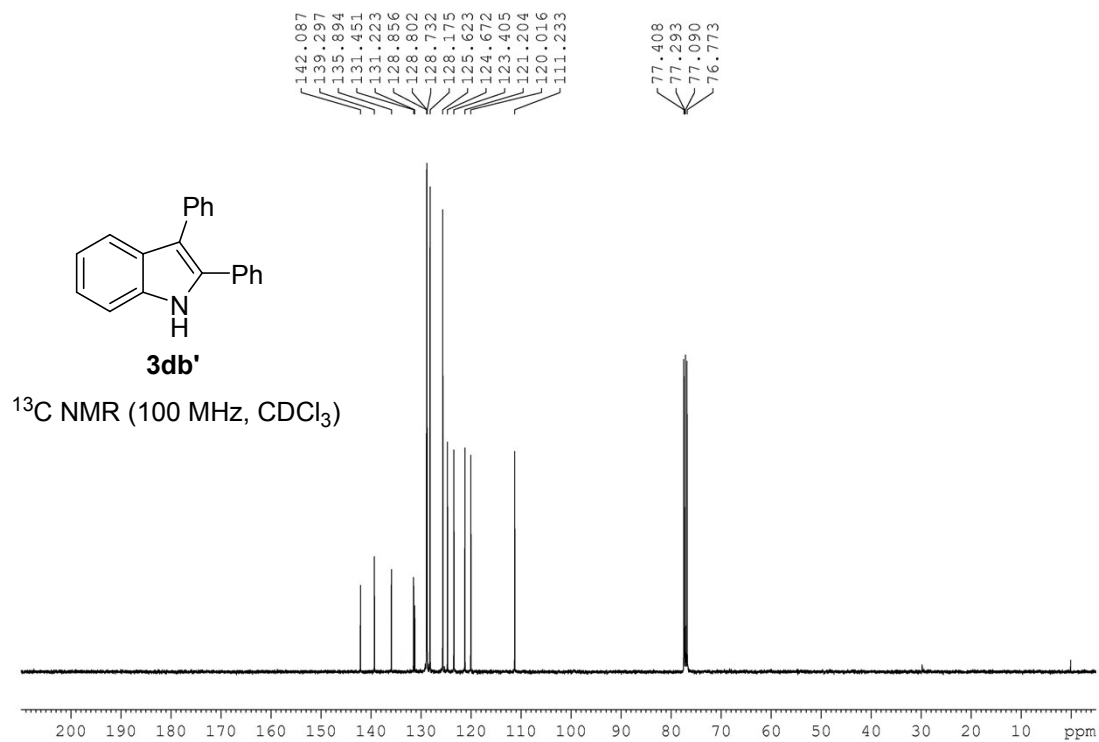

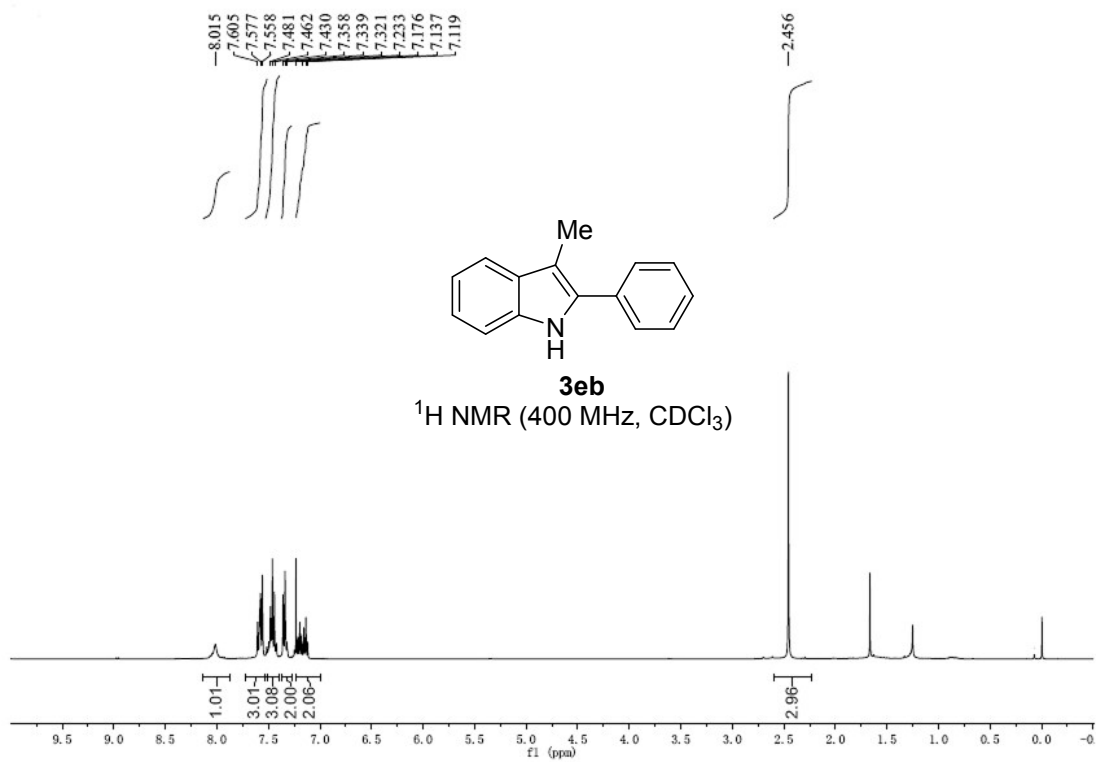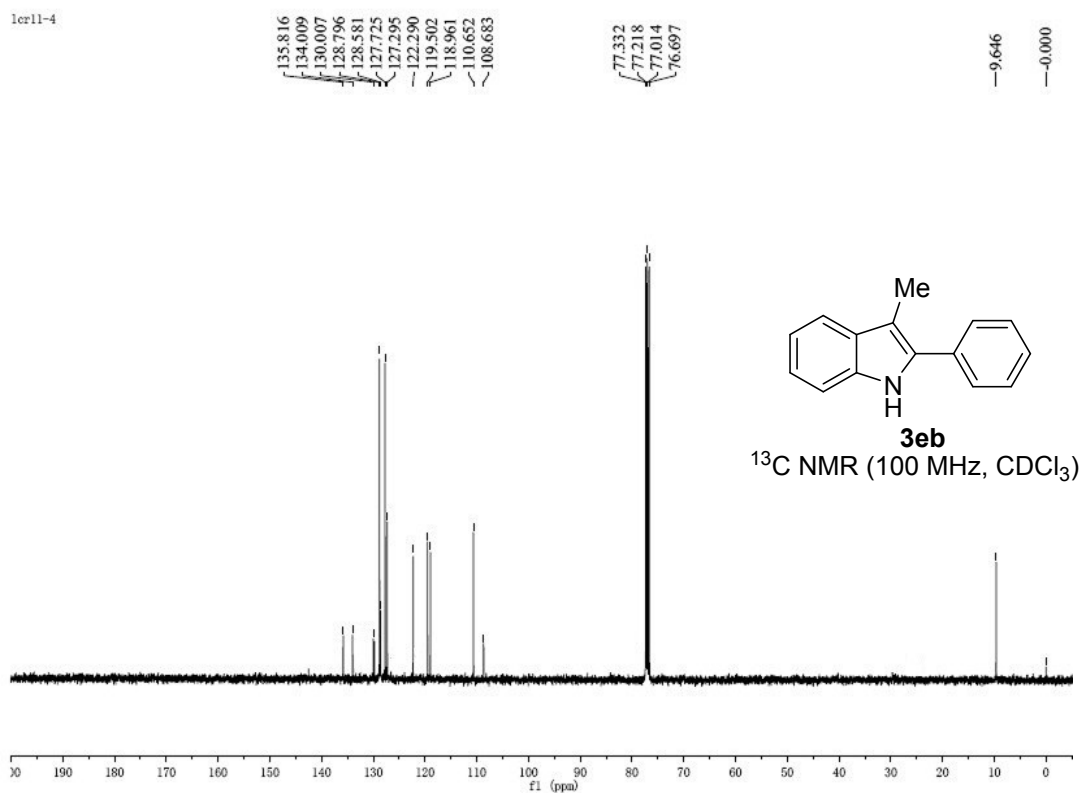

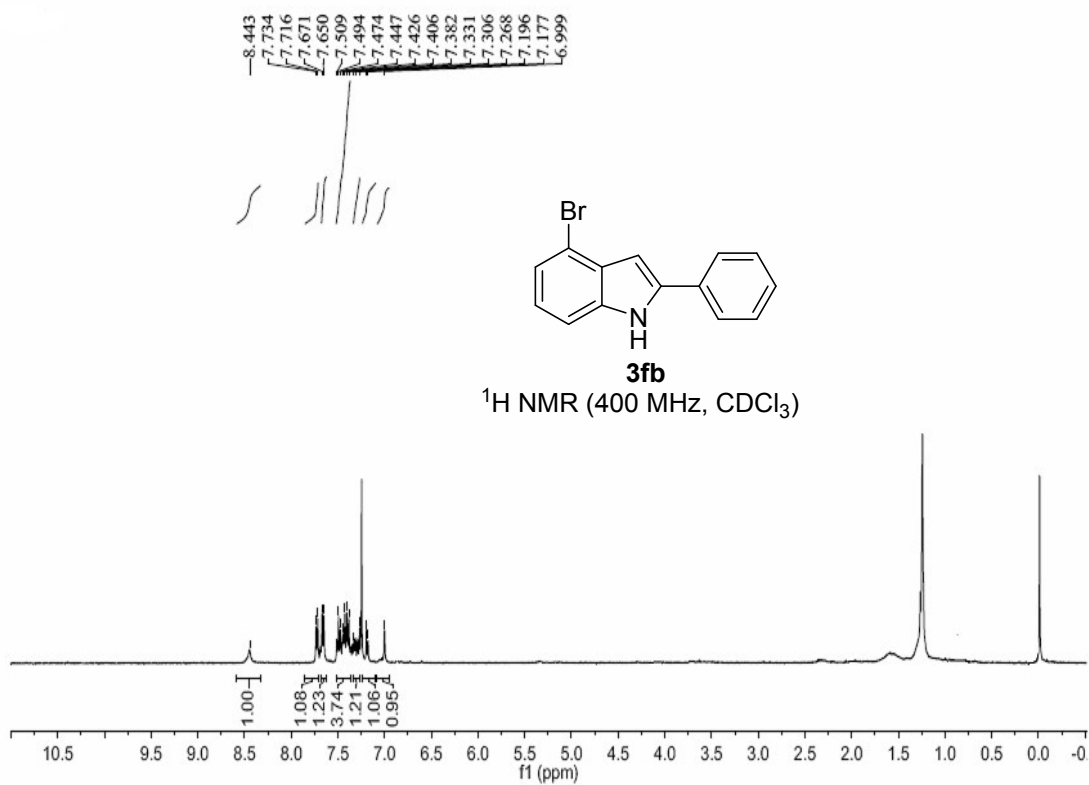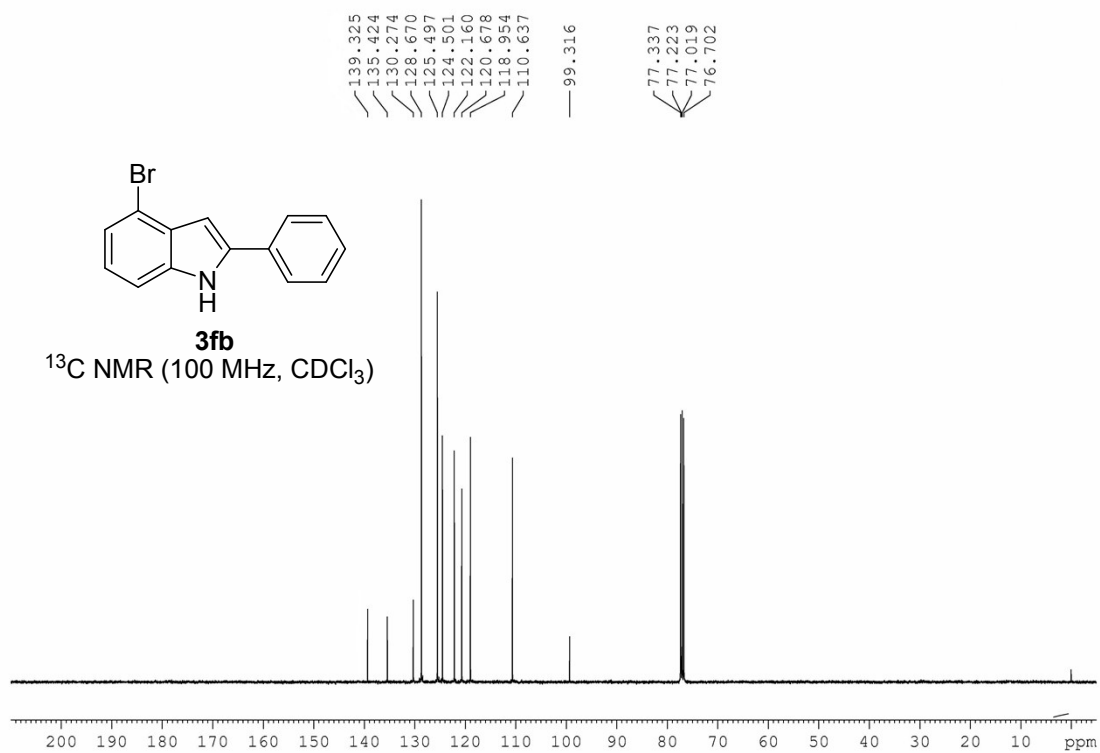

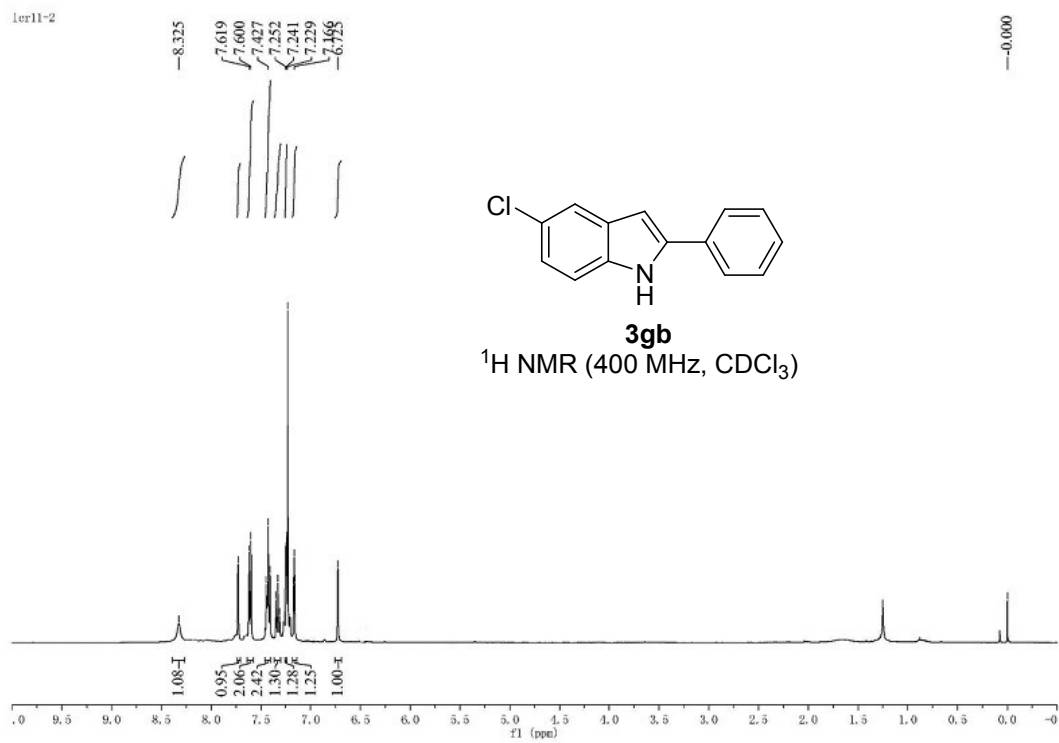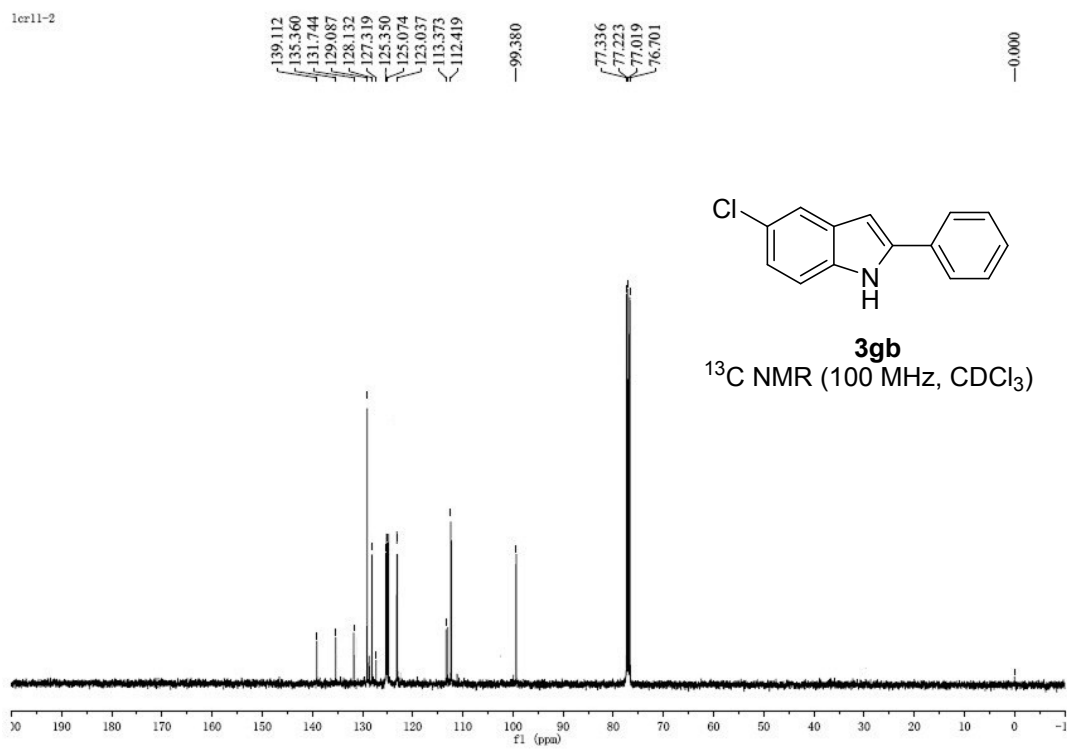

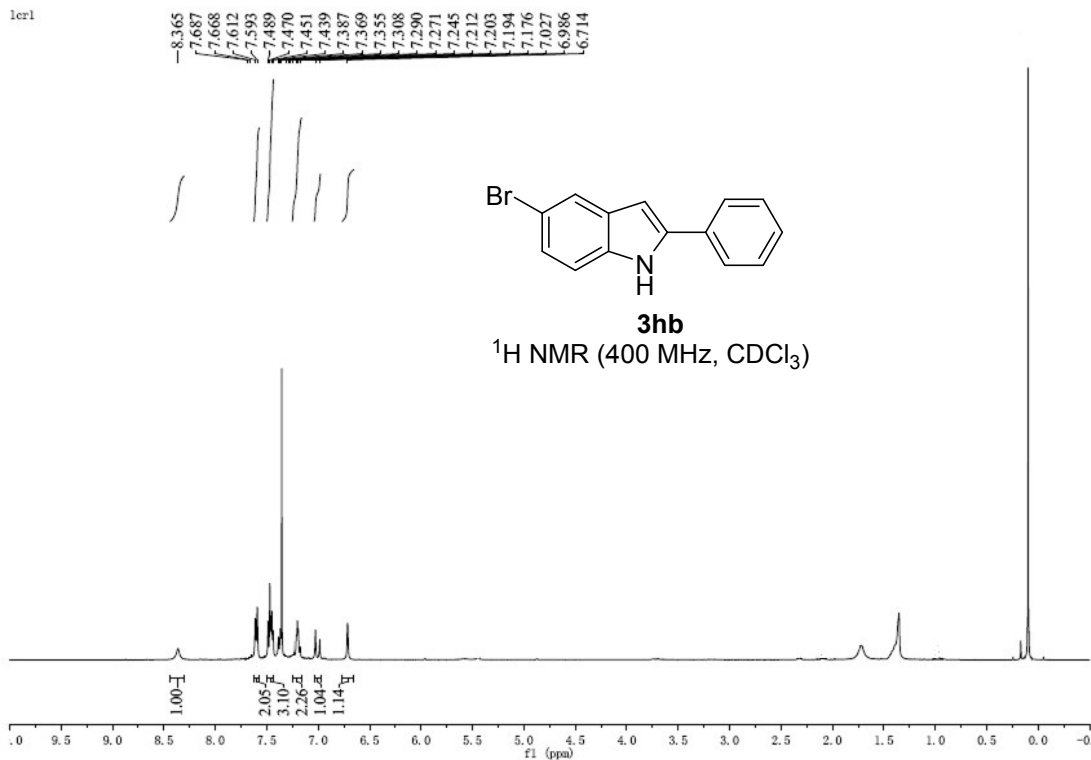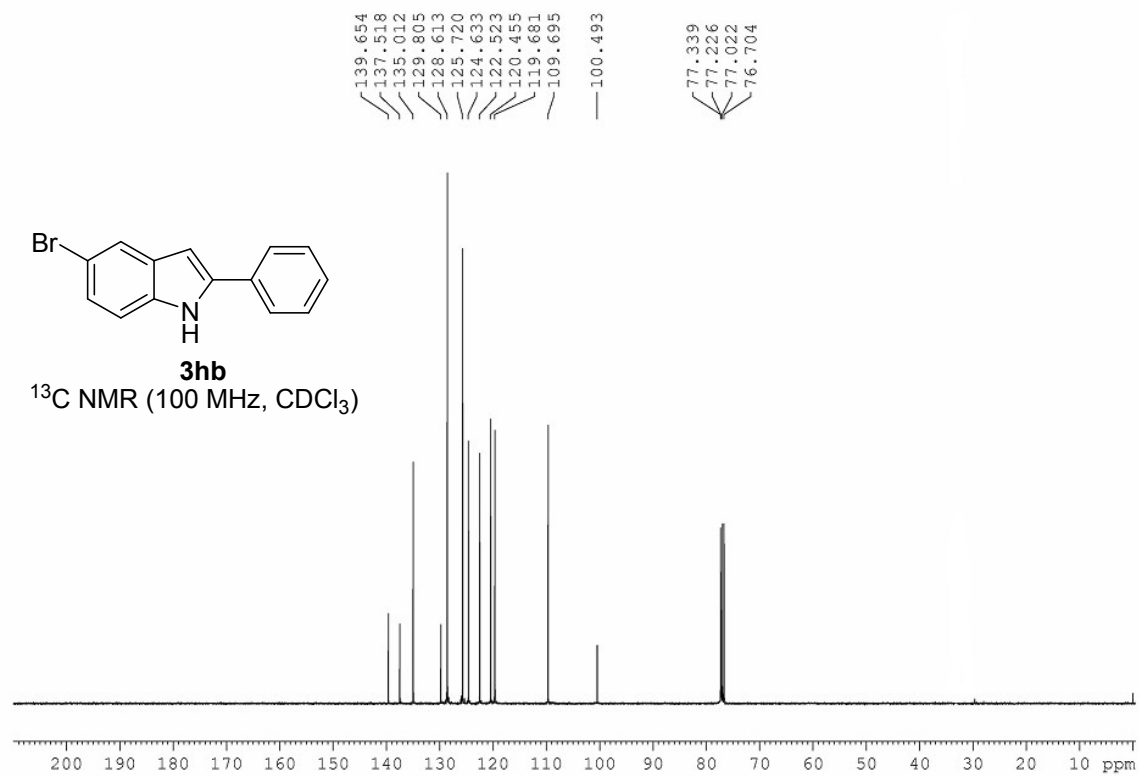

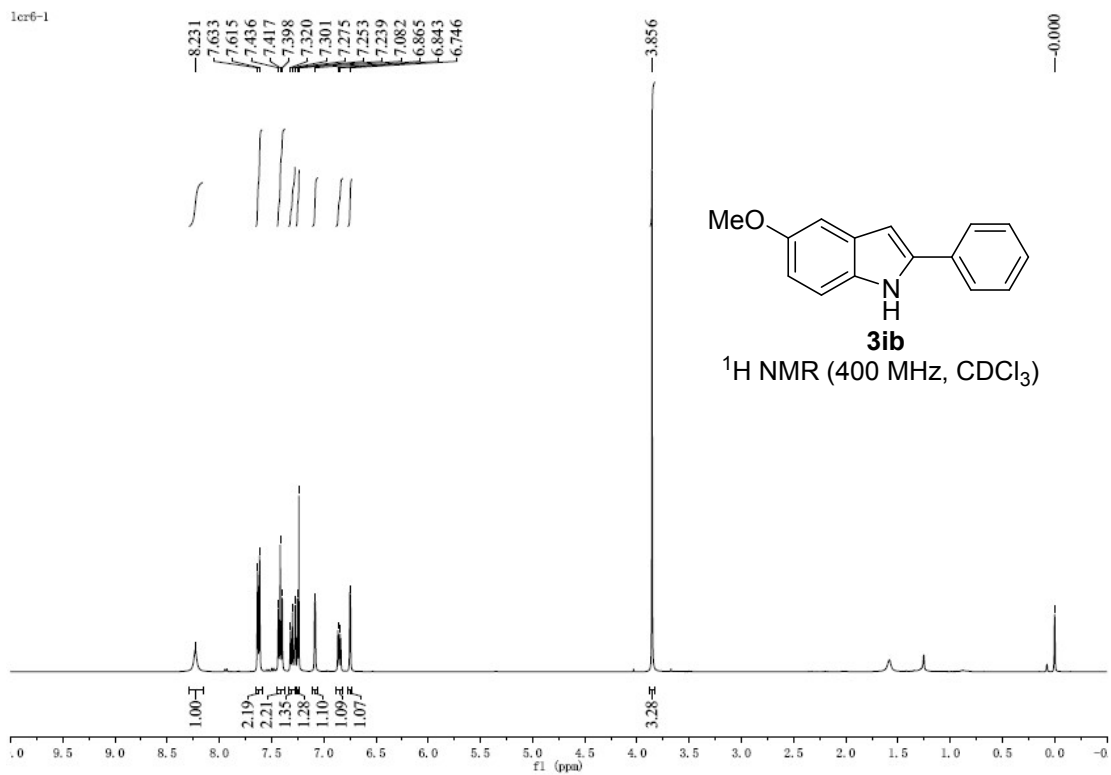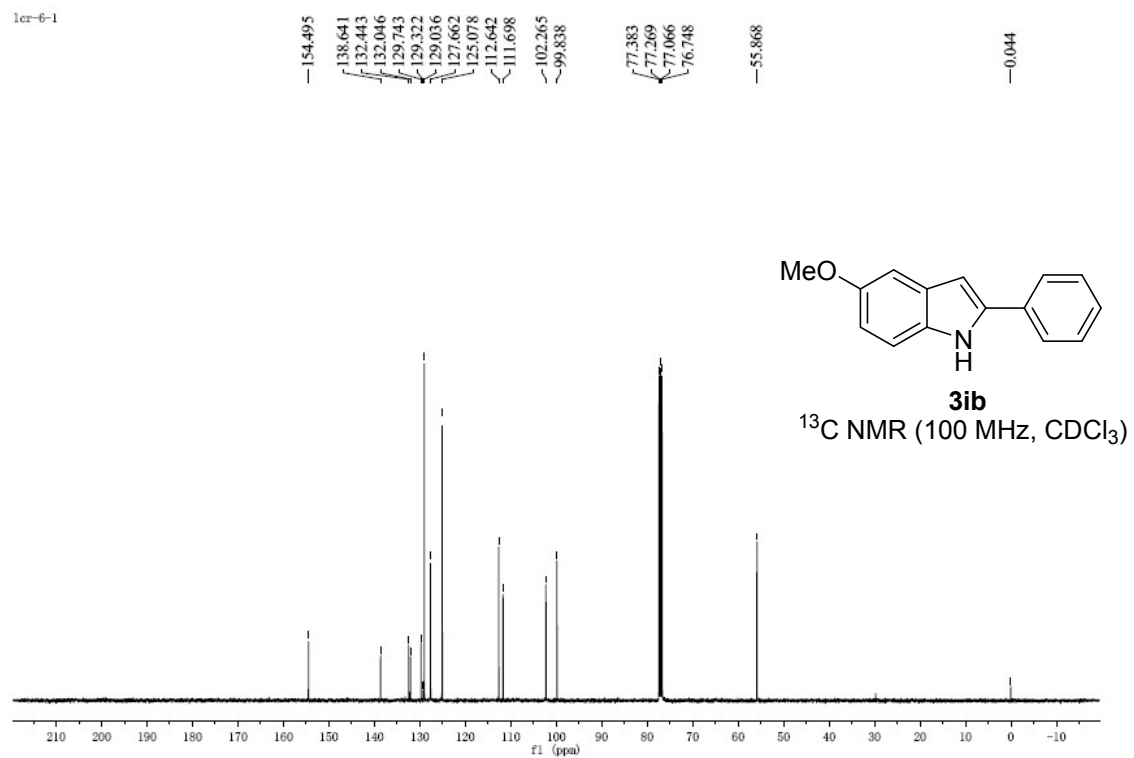

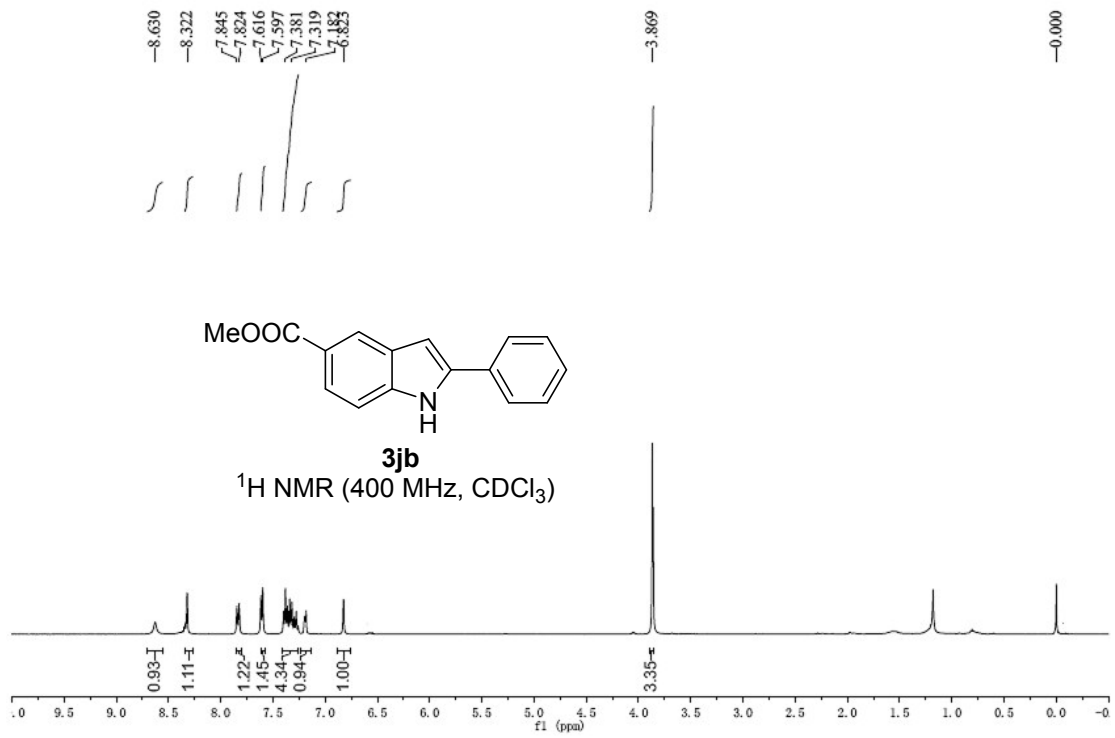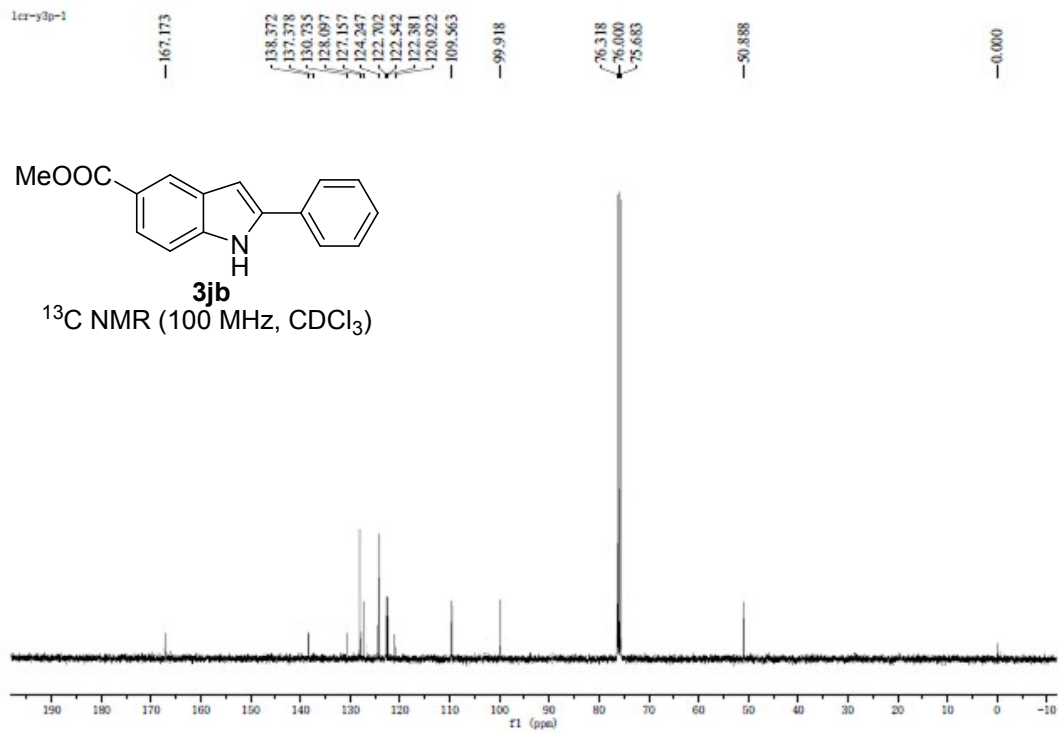



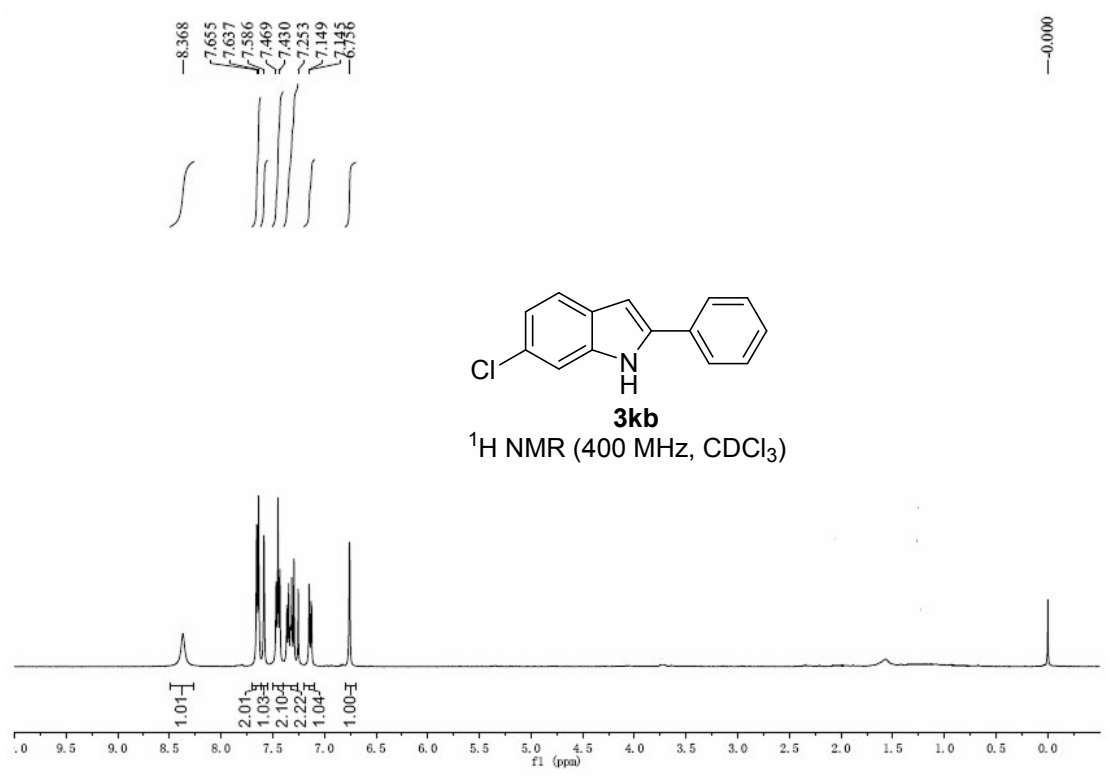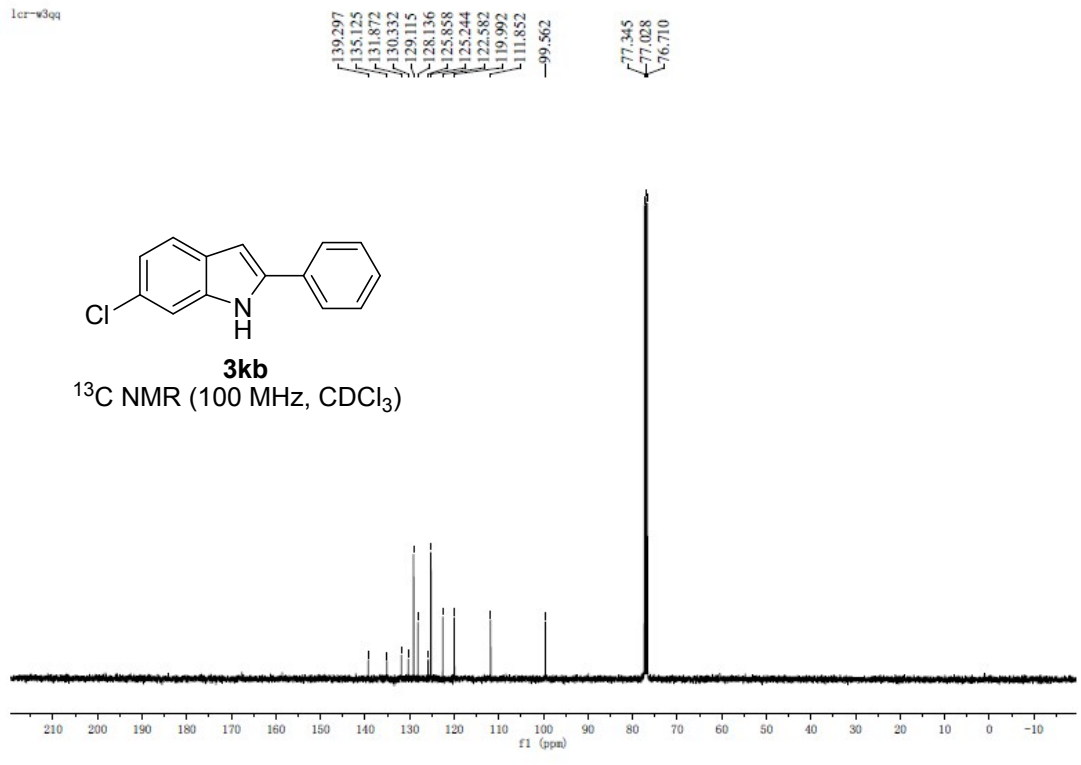

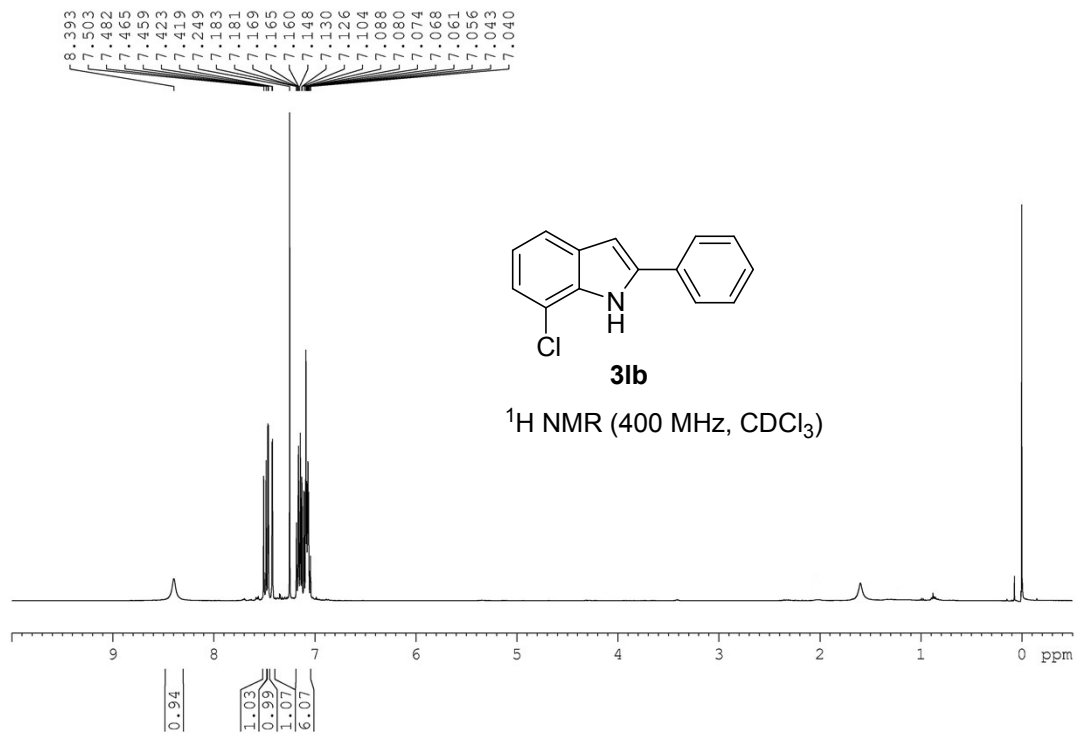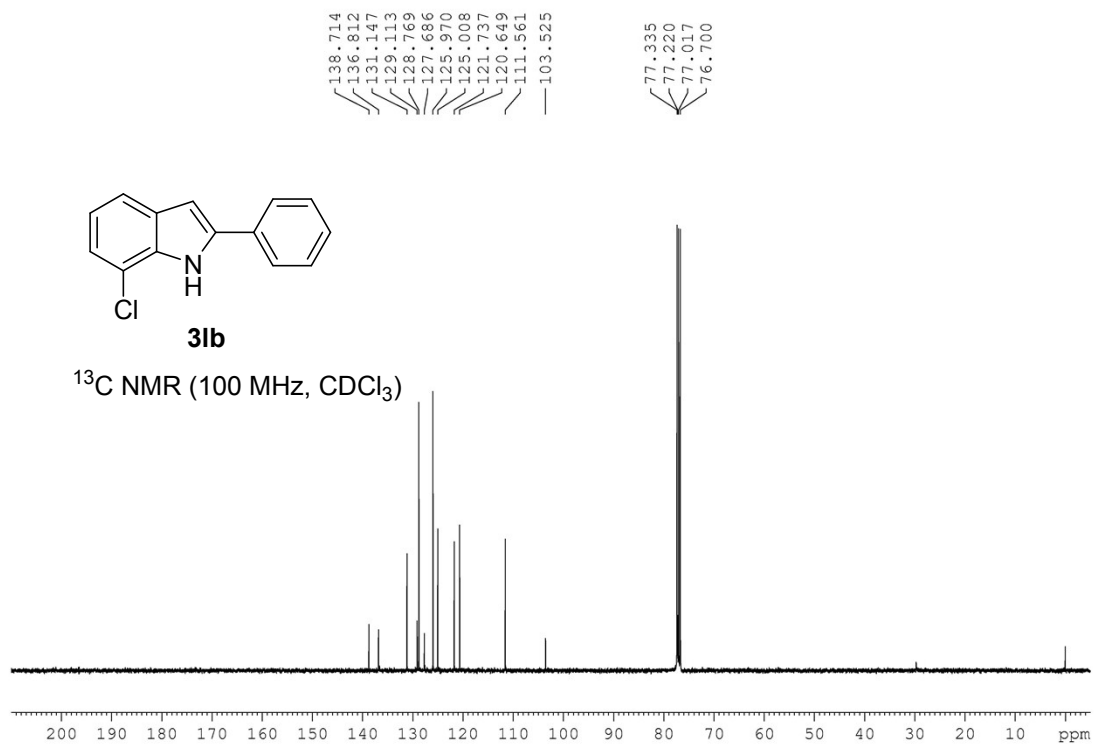

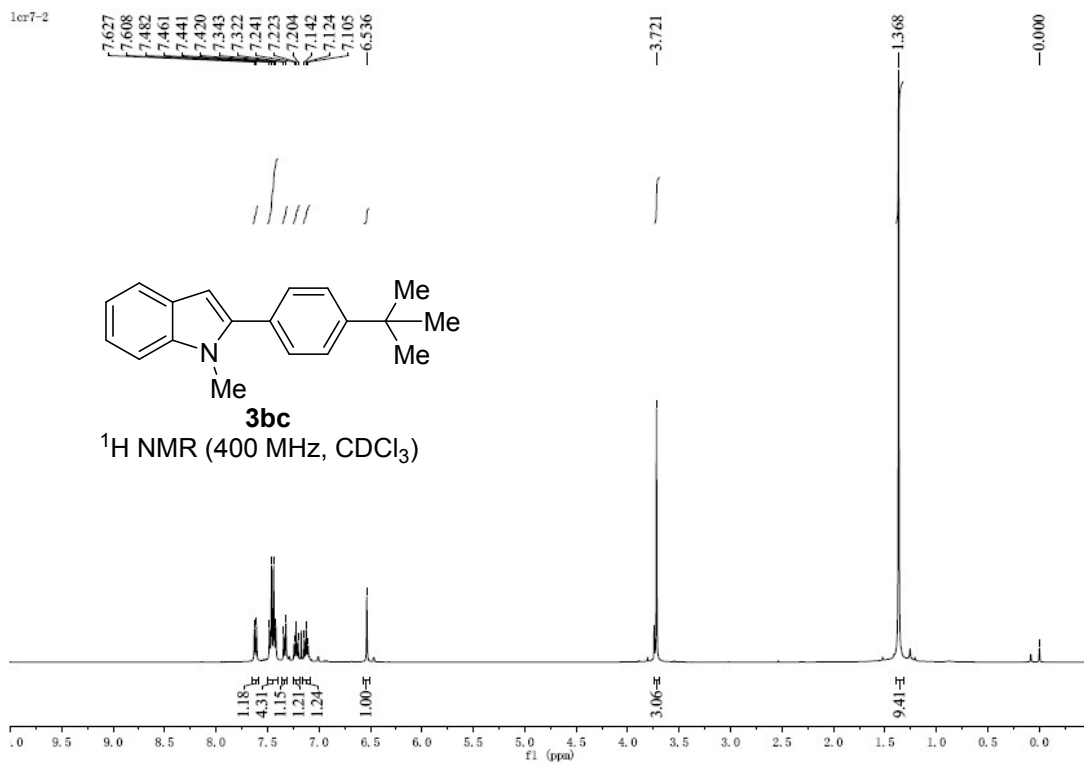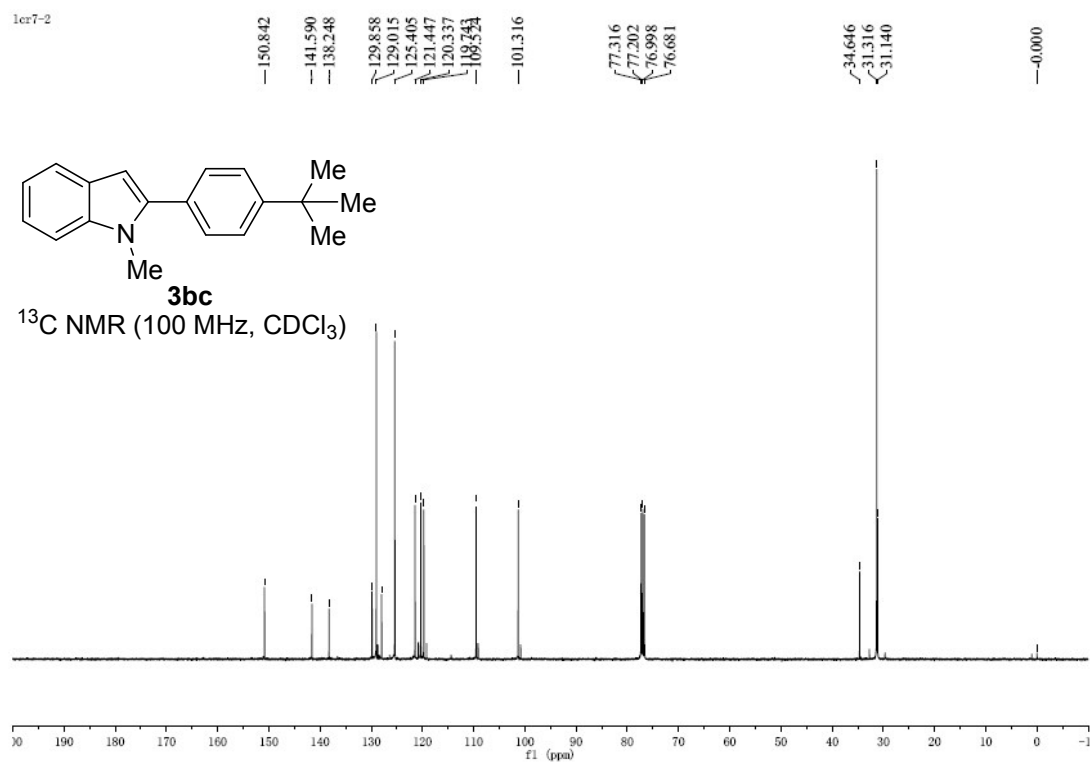

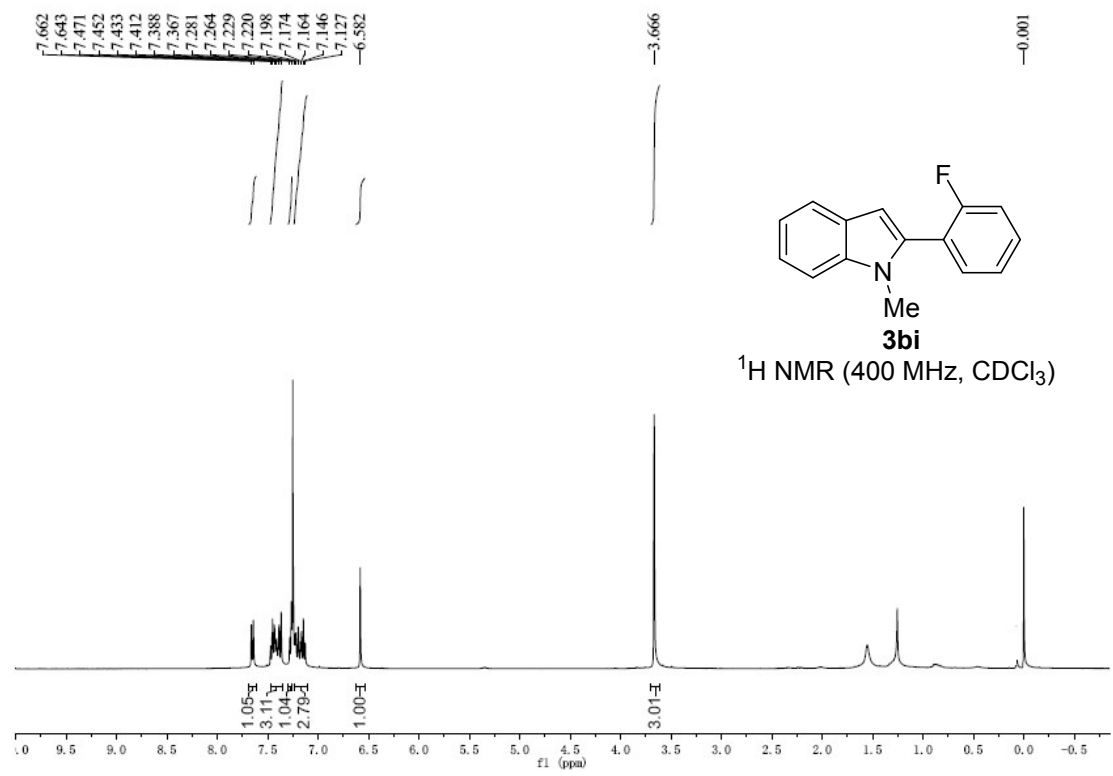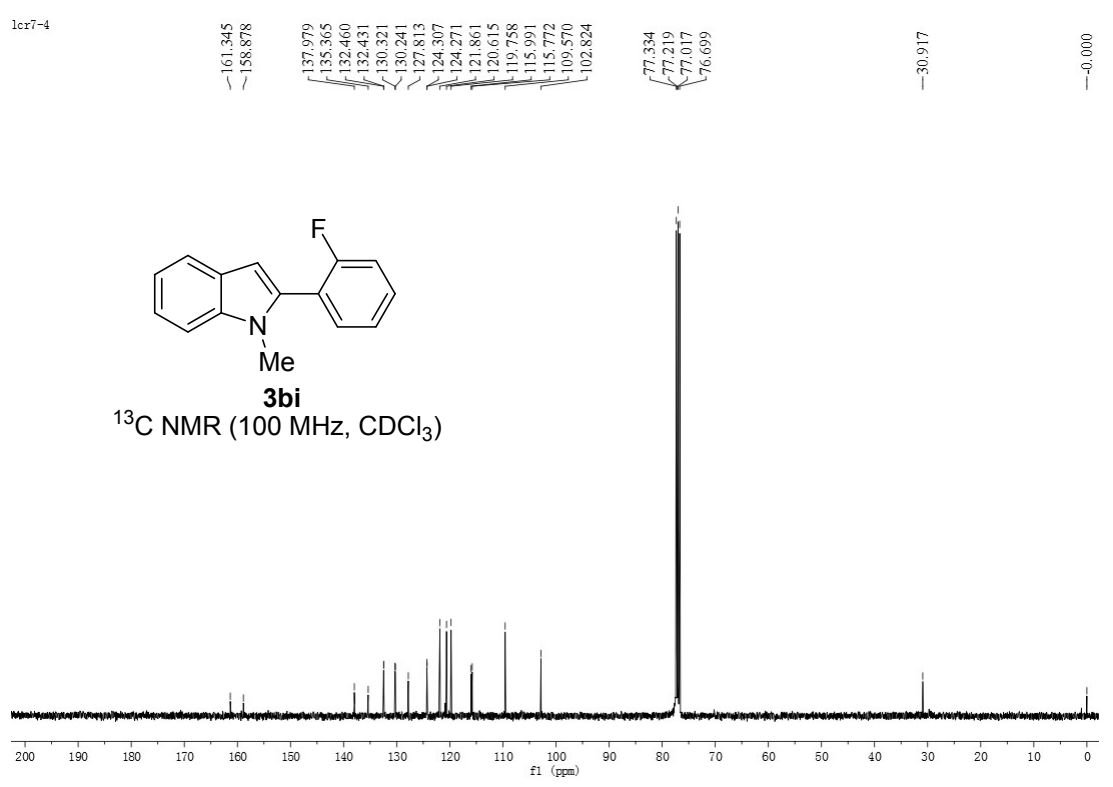

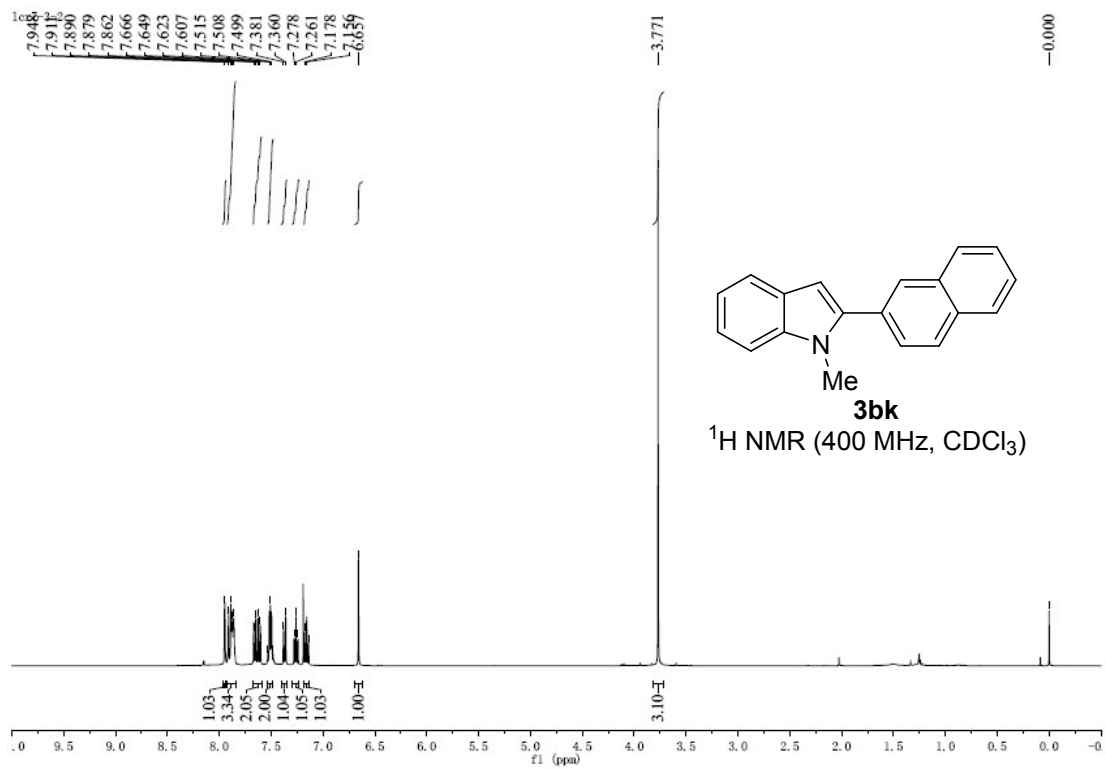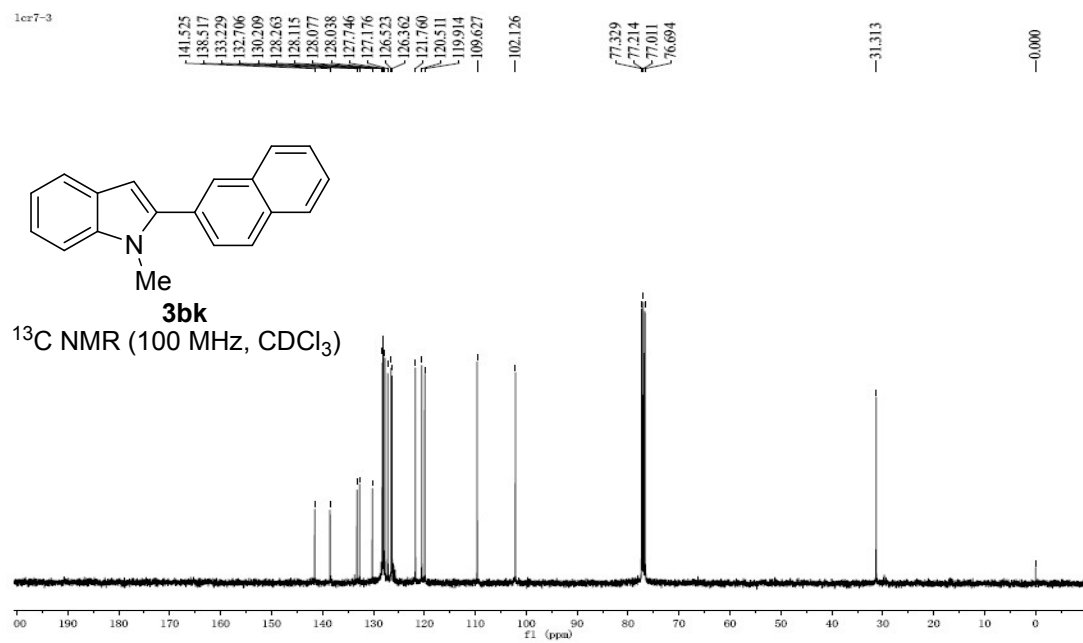

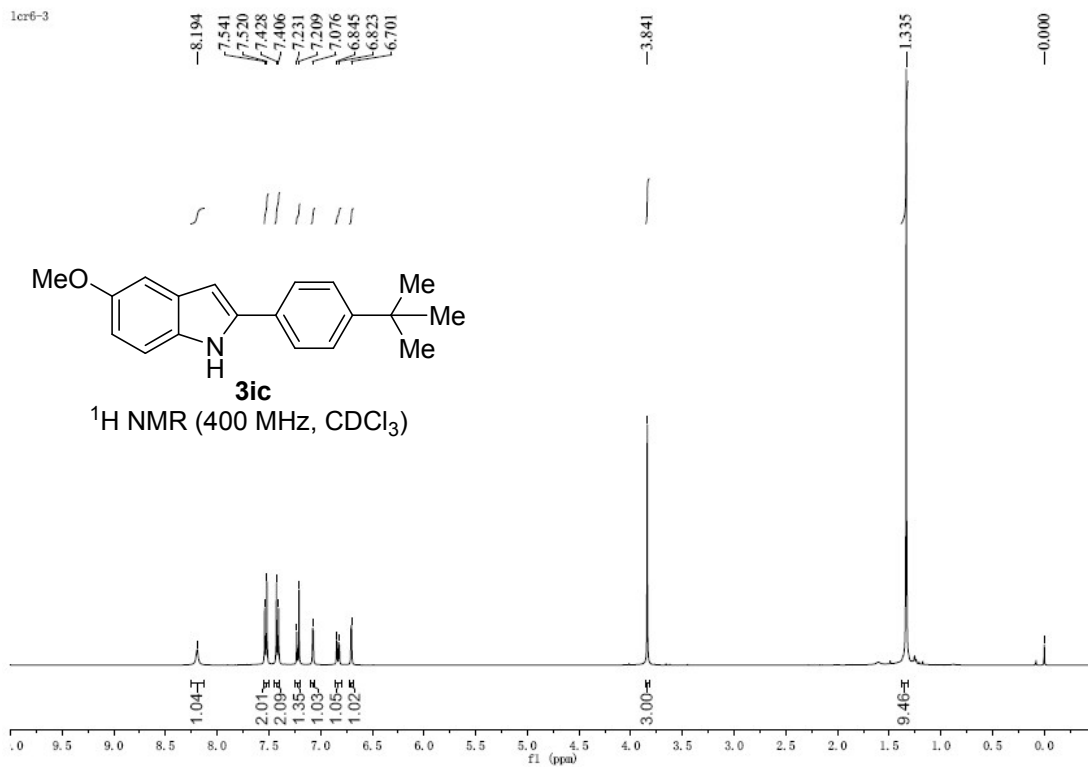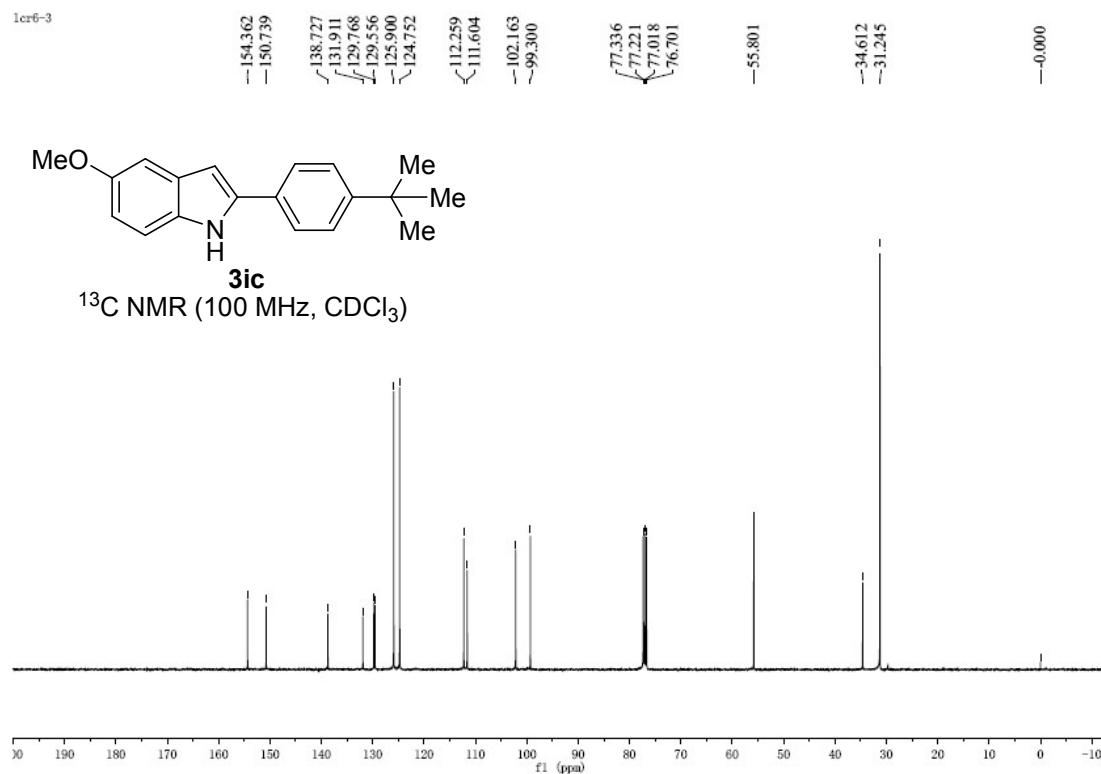

Supplement: c5ob02569a1.pdf [file c5ob02569a1.pdf]
